# Supplementary material for: In Silico Structure and Sequence Analysis of Bacterial Porins and Specific Diffusion Channels for Hydrophilic Molecules: Conservation, Multimericity and Multifunctionality
Source: MDPI journal article supplement (doi:10.3390/ijms17040599), 2016-04-21
Supplement: s1 [file s1]

## MSA: Multiple Sequence Alignments

(mview format)

## Cluster 1A

```

CONSENSUS      IAVAALASVAQAAPQDNTWTYAGAKLGWSQFHDGGQGGNGKDNNGNPTDRNSLGAAGAFGGYQPNPYLAFELGYDNLGRMPKYGVDVNGGAFKAQGVQLSLKLSYPTDLDIYVYGRLLGGAVWRADSKGNVYAGGARLKDHDTGVSPLAALGVEYAITPNIAATRLLEYQWNNIGDANTVGYRPNNGSLSLGVSYRFGQDEAAPVVAAPAPAPV
150594392.pir  VALAGFATVAQAAPKDNWTYAGKLGWSQYHDTGFYGNMGFNNNGPTRNDQLGAGAFGGYQANPYLGFEMGYDNLGRMPKYGVSVDNGGAFKAQGVQLTAKLSYPTDLDIYVYGRLLGGVWRADSKGNVYASTGVSRSBHDGTGVSVPFAGGVEAWTRDIAATRLLEYQWNNIGDAGTVGTRPNDGMSLGVSYRFGQDEAAPVVAAPAPAPAP
639191197.pir  VALAGFATVAQAAPKDDTWTYAGKLGWSQYHDTGFYGNMGYNGNGPETHESQLGAGAFGLGYQANPYLGFEMGYDNLGRMPKYGVSVDNGGAFKAQGVQLAALKSYPIADDLDIYVYGRLLGGVWRADSSAHYGATDQRLSNHDTGVSPLAAGVEYALTKNWATRLDQWNNIGDAGTVGARPDNMSLGVSYRFGQDEAAPVVAAPAPAPV
320577122.pir  VALAGFATVAQAAPKDDTWTYAGKLGWSQYHDTGFYGNMGFNNNGPTRNDQLGAGAFGLGYQANPYLGFEMGYDNLGRMPKYGVSVDNGGAFKAQGVQLAALKSYPIADDLDIYVYGRLLGGVWRADSKGAYDNGHNaVSDHDTGVSPLAAGVEYALTKNWATRLDQWNNIGDAGTVGTRPNDGMSLGVSYRFGQDEAVPAPAPAPAPV
377818202.pir  VALAGFATVAQAAPKDDTWTYAGKLGWSQYHDTGFYGNMGYNGNGPETHESQLGAGAFGLGYQANPYLGFELGYDNLGRMPKYGVSVDNGGAFKAQGVQLAALKSYPIADDLDIYVYGRLLGGVWRADSTQNNVATGNSHDTGVSPLAAGVEYALTKNWATRLDQWNNIGDAVTGVARPDNTATSLGVSYRFGQDEAAPVVAAPAPAPV
445211870.pir  VALAGFATVAQAAPKDNWTYAGKLGWSQYHDTGFYGNMGYNGNGPETHESQLGAGAFGLGYQANPYLGFELGYDNLGRMPKYGVSVDNGGAFKAQGVQLAALKSYPIADDLDIYVYGRLLGGVWRADSKANYTGQRSLSDHDTGVSPLAAGVEYALTKNWATRLDQWNNIGDAGTVGARPDNTATSLGVSYRFGQDDAVPAPAPAPAPV
515917846.pir  VALAGFATVAQAAPKDDTWTYAGKLGWSQYHDTGFYGNMGYNGNGPETHESQLGAGAFGLGYQANPYLGFELGYDNLGRMPKYGVSVDNGGAFKAQGVQLAALKSYPIADDLDIYVYGRLLGGVWRADSTQNNVATGNSHDTGVSPLAAGVEYALTKNWATRLDQWNNIGDAVTGVARPDNTATSLGVSYRFGQDEAAPVVAAPAPAPV
544019843.pir  VALAGFATVAQAAPKDDTWTYAGKLGWSQYHDTGFYGNMGYNNNGPETHESQLGAGAFGLGYQANPYLGFELGYDNLGRMPKYGVSVDNGGAFKAQGVQLAALKSYPIADDLDIYVYGRLLGGVWRADSTQNTPTTGRTSIDSHDTGVSPLAAGVEYALTKNWATRLDQWNNIGDAGTVGARPDNTATSLGVSYRFGQDEAAVVAAPTAPAPV
568965564.pir  VALAGFATVAQAAPKDNWTYAGKLGWSQYHDTGFYGNMGYNNNGPETHESQLGAGAFGGYQANPYVPGFEMGYDNLGRMPKYGVSVDNGGAFKAQGVQLAALKSYPIADDLDIYVYGRLLGGVWRADSKGNYDNGITTVRSNHDGTGVSPLAAGVEYALTDRIDATRLDQWNNIGDAVTGVARPDNTATSLGVSYRFGQDEAAPVVAAPAPAPAP
321167474.pir  VALAGFATVAQAAPKDNWTYAGKLGWSQYHDTGFANAYNGICNGPETHESQLGAGAFGLGYQANPYLGFEMGYDNLGRMPKYGVSVDNGGAFKAQGVQLAALKSYPIADDLDIYVYGRLLGGVWRADAKGNFNNGnGRVSDHDTGVSPLAAGVEYALTKNWATRLDQWNNIGDAVTGVARPDNTATSLGVSYRFGQDEAAPVVAAPAPAPV
507923870.pir  VALAGFTTLAQAAPKDNWTYAGKLGWSQYHDTGFYGNMGYNNNGPETHESQLGAGAFGGYQANPYLGFELGYDNLGRMPKYGVSVDNGGAFKAQGVQLAALKSYPIADDLDIYVYGRLLGGVWRADSTQNNR...NGTRISNHDGTGVSPLAAGVEYALTKNWATRLDQWNNIGDANTVGTTRPNDGMSLGVSYRFGQDDAAPVVAAPAPAPV
658468934.pir  VALAGFATVAQAAPKDNWTYAGKLGWSQYHDTGFYGNMGYNNNGPETHESQLGAGAFGLGYQANPYLGFELGYDNLGRMPKYGVSVDNGGAFKAQGVQLAALKSYPIADDLDIYVYGRLLGGVWRADSSAHYKATDQRLSNHDTGVSPLAAGVEYALTKNWATRLDQWNNIGDAGTVGARPDNTATSLGVSYRFGQDDAAPVVAAPAPAPV
386924607.pir  VALAGFATVAQAAPKDNWTYAGKLGWSQYHDTGFYGNMGYNNNGPETHESQLGAGAFGGYQPNPYLAFELGGYDNLGRMPKYGVDVNGGAFKAQGVQLTAKLSYPIADDLDIYVYGRLLGGVWRADAKNNVV...GGDRRSNHDGTGVSVPFAGGVEYAWTPSIATRLLEYQWNNIGDAGTVGTRPNDGMSLGVSYRFGQDEAAPVVAAPAPAPQ
VAVAAFTTAAQAAPKDNWTYAGKLGWSQYHDFVFNFGNGYThcNGPETHESQLGAGAFGLGYQANPYLGFELGYDNLGRMPKYGVSVDNGGAFKAQGVQLAALKSYPIADDLDIYVYGRLLGGVWRADSKATYGATNTHRKDHDTGVSPLAAGVEYALTKNWATRLDQWNNIGDAGTVGARPDNGLSLGVSYRFGQDEAAPVVAAPVPAVPT
562747541.pir  VALAGFATVAQAAPKDDTWTYAGKLGWSQYHDTGFYGNMGYNNNGPETHESQLGAGAFGLGYQANPYLGFELGYDNLGRMPKNGETNNGGAFKAQGVQLAALKSYPIADDLDIYVYGRLLGGVWRADATQNTPTYGRTSIDSHDTGVSPLAAGVEYALTKNWATRLDQWNNIGDAGTVGTRPNDGMSLGVSYRFGQDDAVPVAAPAPAPV
KpOmpA.pir  ...MKAIFVLAAPKDNWTYAGKLGWSQYHDTGFYGNMGFNNNGPTRNDQLGAGAFGGYQANPYLGFEMGYDNLGRMPKYGVSVDNGGAFKAQGVQLTAKLSYPIADDLDIYVYGRLLGGVWRADSKGNYASTGVSRSBHDGTGVSVPFAGGVEAWTRDIAATRLLEYQWNNIGDAGTVGTRPNDGMSLGVSYRFGQDEAAPVVAAPAPAPAP
653403653.pir  VALAGFATVAQAAPMNDWTYAGKLGWSQYHDTGFYGNMGYSANNGPETHESQLGAGAFGGYQANPYVPGFEMGYDNLGRMPKYGVSVDNGGAFKAQGVQLTAKLSYPIADDLDIYVYGRLLGGVWRADSKGN...TGLKDHDTGVSVPFAGGVEYAFTEIATRLLEYQWNNIGDAGTVGARPDNGLSLGVSYRFGQDEAPVVAAPAPAPAP
535653471.pir  VALAGFATVAQAAPKDNWTYAGKLGWSQYHDTG...FINNNNGPETHESQLGAGAFGGYQANPYVPGFEMGYDNLGRMPKYGVSVDNGGAFKAQGVQLTAKLSYPIADDLDIYVYGRLLGGVWRADTKSNVP...GGVSTDHDTGVSVPFAGGVEYAFTEIATRLLEYQWNNIGDAHTIGTRPDNGLSLGVSYRFGQDEAAPVVAAPAPAPV
498911745.pir  IAVAAPATAQAAPKDNWTYAGKLGWSQYHDFVFNFGNGYDngSTHESQLGAGAFGLGYQANPYLGFELGYDNLGRMPKYGVSVDNGGAFKAQGVQLTAKLSYPIADDLDIYVYGRLLGGVWRADSSATYANARLRKDHDTGVSPLAAGVEYALTKNLATRLDQWNNIGDAVTGVARPDNTATSLGVSYRFGQDEAAPVVAAPVPAAPV
515914328.pir  VALAGFATVAQAAPKDNWTYAGKLGWSQYHDTGFYGNMGYDngSTHESQLGAGAFGGYQANPYVPGFEMGYDNLGRMEYTGNTENNGGAFKAQGVQLTAKLSYPIADDLDIYVYGRLLGGVWRADSSASAKNA...LGDRLKDHDTGVSPLAAGVEAWTRDIAATRLLEYQWNNIGDAHTVGTTRPDNGLSLGVSYRFGQDDAVPVAAPVPAAPV
539212611.pir  VALAGFATVAQAAPKDNWTYAGKLGWSQYHDTGFNGNGYDngsGPTHESQLGAGAFGLGYQANPYVPGFELGYDNLGRMEYKQPNAGLKAQGIQLTAKLSYPIADDLDIYVYGRLLGGVWRADTAVNA...EGVRLKDHDTGVSPLAAGVEAWTRDIAATRLLEYQWNNIGDRMTVGTTRPDNGLSLGVSYRFGQDEAAPVVAAPAPAPAP
666611786.pir  VAVAAFAITVAQAAPKDNWTYAGKLGWSQYHDFVFNFGNGYDngGPTHESQLGAGAFGLGYQANPYLGFELGYDNLGRMEYKGSVDNGGAFKAQGVQLAALKSYPIADDLDIYVYGRLLGGVWRADSSATYANARLRKDHDTGVSPLAAGVEYALTKNLATRLDQWNNIGDAASVGARPDNGLSLGVSYRFGQDDAVPVAAPVPAAPV
238728287.pir  VALAGFATVAQAAPKDNWTYAGKLGWSQYDGTGFYGVGDVNGDPETHESQLGAGAFGLGYQANPYLGFELGYDNLGRMPKYGVSVDNGGAFKAQGVQLAALKSYPIA...LDIYVYGRLLGGVWRADSSAYATDPTRSSNHDGTGVSPLAAGVEYALTKNWATRLMEYQWNNIGDAGTVGARPDNGLSLGVSYRFGQDDAAPVVAAPAPAPV
575847724.pir  VAVATFATAQAAPKDNWTYAGKLGWSQYHDFVFNFGNGYDngGPTHESQLGAGAFGLGYQANPYLGFELGYDNLGRMEYKGSVDNGGAFKAQGVQLTAKLSYPIADDLDIYVYGRLLGGVWRADSSATYNSNARLRKDHDTGVSPLAAGVEYALTKNLATRLDQWNNIGDAVTGVARPDNGLSLGVSYRFGQDEAAPV1PpaPAPAPV
540747295.pir  VALAGFATLAQAAPKDNWTYAGKLGWSKYDGTGFNGGFSnngPETHESQLGAGAFGLGYQANPYLGFEMGYDNLGRMPKYGVSVDNGGAFKAQGVQLTAKLSYPIADDLDIYVYGRLLGGVWRADSKANYNNGRRRSNHDGTGVSPLAAGVEYALTKNLATRLDQWNNIGDKGTVGTARPDNTATSLGVSYRFGQDEAAPVVAAPAPAPV
538296451.pir  VALAGFATVAQAAPQDNTWTYAGKLGWSQYHDSGMNNAIKGVGNGPETHESQLGAGAFGLGYQANPYVPGFEMGYDNLGRMPKYGVSVDNGGAFKAQGVQLTAKLSYPIADDLDIYVYGRLLGGVWRADSKGNFG...NGTRISNHDGTGVSPLAAGVEYAITKQWATRLLEYQWNNIGDAATVGTARPDNTATSLGVSYRFGQDEAAPVVAAPAPAPV
391321428.pir  VALAGFATVAQAAPKDNWTYAGKLGWSQYHDTG...NNQNNNGPETHESQLGAGAFGGYQANPYVPGFEMGYDNLGRMPKYGNTENNGGAFKAQGVQLTAKLSYPIADDLDIYVYGRLLGGVWRADAKNN...DGFKDHDTGVSVPFAGGVEYAFTEIATRLLEYQWNNIGDAVTGVARPDNTATSLGVSYRFGQDEAAPVVAAPAPAPAP
238707374.pir  VALAGFATVAQAAPKDNWTYAGKLGWSQYHDFVGT...GSDISNNGPETHESQLGAGAFGLGYQANPYLGFEMGYDNLGRMPKYGVSVDNGGAFKAQGVQLAALKSYPIA...LDIYVYGRLLGGVWRADSSANVPSTSHASADHDTGVSPLAAGVEYALTKNWATRLDQWNNIGDRGTVGTARPDNGLSLGVSYRFGQDDAVPVAAPVPAAPV
596542407.pir  VALAGFATVAQAAPKDNWTYAGKLGWSQYQNTGTGgyGDNDGPTHESQLGAGAFGLGYQANPYLGFELGYDNLGRMPKYGVDNGGAFKAQGVQLAALKSYPIA...LDIYVYGRLLGGVWRADSSAFNAASGERLNNHDTGVSPLAAGVEYALTKNLATRLDQWNNIGDAVTGVARPDNTATSLGVSYRFGQDDAAPVVAAPVPAAPV
661561039.pir  MAVAAFTAAQAAPKDNWTYAGKLGWSQYHDFVFNFGNGYDngNSAHKNQLGAGAFGLGYQANPYLGFELGYDNLGRMEYKGSVDNGGAFKAQGVQLTAKLSYPIADDLDIYVYGRLLGGVWRADSSATYANARLRKDHDTGVSPLAAGVEYALTKNLATRLDQWNNIGDAVTGVARPDNGLSLGVSYRFGQDEAAPVVAAPVPAAPV
320029504.pir  VALAGFATVAQAAPKDNWTYAGKLGWSQYHDTGFYGNMGYDngGPTHESQLGAGAFGLGYQANPYLGFELGYDNLGRMPKYGVSVDNGGAFKAQGVQLAALKSYPIADDLDIYVYGRLLGGVWRADSKASYD...NVRRLSANHDTGVSPLAAGVEYALTKNLATRLDQWNNIGDAGTVGARPDNTATSLGVSYRFGQDDAVPVAAPVPAAPV
488393628.pir  VALAGFATVAQAAPKDNWTYAGKLGWSQYHDTG...PTPNNGPETHESQLGAGAFGGYQANPYVPGFEMGYDNLGRMPKYGVSVDNGGAFKAQGVQLTAKLSYPIADDLDIYVYGRLLGGVWRADSKNYIP...GASFSKDHDTGVSVPFAGGVEAWTRDIAATRLLEYQWNNIGDAHTVGTTRPDNGLSLGVSYRFGQDEAAPVVAAPAPAPAP
555088851.pir  VALAGFATVAQAAPKDNWTYAGKLGWSQYHDTGWY...NSSLNDNGPETHESQLGAGAFGGYQANPYVPGFEMGYDNLGRMPKYGDTINGGAFKAQGVQLTAKLSYPIADDLDIYVYGRLLGGVWRADSSNNI...SGDNHDTGVSVPFAGGVEAWTRDIAATRLLEYQWNNIGDMTGVGTTRPDNGLSLGVSYRFGQDEAAPVVAAPAPAPAP
EcOmpA.pir  VALAGFATVAQAAPKDNWTYAGKLGWSQYHDTG...FINNNNGPETHESQLGAGAFGGYQANPYVPGFEMGYDNLGRMPKYGVSVDNGGAFKAQGVQLTAKLSYPIADDLDIYVYGRLLGGVWRADTKSN...VYKGDHDTGVSVPFAGGVEYAFTEIATRLLEYQWNNIGDAHTIGTRPDNGLSLGVSYRFGQDEAAPVVAAPAPAPAP
647629804.pir  VALAGFATVAQAAPKDNWTYAGKLGWSQYHDTGFYGNMGYVNSNDP...HEMQLGAGAFGLGYQANPYLGFELGGYDNLGRMPKYN...TNHGAFAQGVQLAALKSYPIADDLDIYVYGRLLGGVWRADSKDF...RNGNSBHDGTGVSPLAAGVEYALTKNWATRLDQWNNIGDAGTVGARPDNTATSLGVSYRFGQDDAAPVVAAPAPAPV
708749336.pir  VALAGFATVAQAAPKDNWTYAGKLGWSQYHDTGWY...NDLLNNNGPETHESQLGAGAFGGYQANPYVPGFEMGYDNLGRMPKYGVSVDNGGAFKAQGVQLTAKLSYPIADDLDIYVYGRLLGGVWRADSSNSIA...GDNHDTGVSPLAAGVEYALTDRIDATRLLEYQWNNIGDAGTVGARPDNTATSLGVSYRFGQDEAAPVVAAPAPAPAP
493948210.pir  VALAGFATVAQAAPKDNWTYAGKLGWSQYHDTG...FINNDNGPETHESQLGAGAFGGYQANPYVPGFEMGYDNLGRMPKYGNDINGAFAQGVQLTAKLSYPIADDLDIYVYGRLLGGVWRADTKSNVPggGASNNKDHDTGVSVPFAGGVEYAITPETAATRLLESQWNNIGDAHTIGTRPDNGLSLGVSYRFGQDEAAPVVAAPAPAPAP
639142206.pir  VALAGFATVAQAAPKDDTWTYAGKLGWSQYHDTGFYGNMGYTDN...DARKDQLGAGAFGLGYQANPYLGFEMGYDNLGRMPKMYKTGA...NTGSGFAQGVQLAALKSYPIADDLDIYVYGRLLGGVWRADSSGA...GNSGNDHDTGVSPLAAGVEYALTKNWATRLDQWNNIGDAGTVGARPDNTATSLGVSYRFGQDEAAPVVAAPAPAPV
655274779.pir  VALAGFATVAQAAPKDNWTYAGKLGWSQYHDTGFYGNMGYVEGSSGT...KNQLGAGAFGLGYQANPYLGFELGYDNLGRMPKYNKGVDNGGAFKAQGVQLAALKSYPIADDLDIYVYGRLLGGVWRADSKDH...GGQGFKDHDTGVSPLAAGVEYALTKNWATRLDQWNNIGDAGTVGTRPNDGMSLGVSYRFGQDTPVAPAPAPAPV
561565430.pir  VAVAAFTAAQAAPKDNWTYAGKLGWSQYHDFVFNFGNGYDngGPTHESQLGAGAFGLGYQANPYLGFELGYDNLGRMPKYGVSVDNGGAFKAQGVQLTAKLSYPIADDLDIYVYGRLLGGVWRADSSATYANARLRKDHDTGVSPLAAGVEYALTKNLATRLDQWNNIGDANSVGARPDNTATSLGVSYRFGQDEAVIAPVPAAPV
282948231.pir  VALAGFATVAQAAPKDNWTYAGKLGWSQYHDTG...FDINNNGPETHESQLGAGAFGGYQANPYVPGFEMGYDNLGRMPKYGVSVDNGGAFKAQGVQLTAKLSYPIADDLDIYVYGRLLGGVWRADTKSHNNITGASTKHDTGVSVPFAGGVEAWTRDIAATRLLEYQWNNIGDANTIGTRPDNGLSLGVSYRFGQDEEAPVIAAPAPAPAP
238713147.pir  VALAGFATVAQAAPKDNWTYAGKLGWSQYDGTG...SIEDNNGPETHESQLGAGAFGLGYQANPYLGFELGYDNLGRMPKYGVSVDNGGAFKAQGVQLAALKSYPIADDLDIYVYGRLLGGVWRADATGSI...NGDRTSBHDGTGVSPLAAGVEYALTKNWATRLMEYQWNNIGDAGTVGARPDNTATSLGVSYRFGQDDAVPVAAPAPAPV
668995539.pir  VALAGFASVVAQAAPQDNTYAGKLGWSQYHDTGWY...DAVNNDNGPETHESQLGAGAFGGYQANPYVPGFEMGYDNLGRMPKMYTGSQTNALKAQGVQLTAKLSYPIADDLDIYVYGRLLGGVWRADSSNN...QGQDNHDTGVSVPFAGGVEAWTRDIAATRLLEYQWNNIGDANSVGVRPDNGLSLGVSYRFGQdAAAPVIAAPAPAPAP
586611009.pir  VALAGFATVAQAAPKDNWTYAGKLGWSQYHDKG...ASLNNNGPETHESQLGAGAFGGYQANPYVPGFEMGYDNLGRMPKYGDTINGGAFKAQGVQLTAKLSYPIADDLDIYVYGRLLGGVWRADAKNN...QKGDHDTGVSVPFAGGVEAWTRDIAATRLLEYQWNNIGDANTVGTTRPDNGLSLGVSYRFGQDEAAPVVAAPAPAPAP
562342851.pir  VALAGLASVVAQAAPKDNWTYAGKLGWSQYHDTGLYNGNYQYTTNSP...HEMQLGAGAFGGYQANPYLGFELGYDNLGRMPKMYTGE...NRGNFKAQGVQLAALKSYPIADDLDIYVYGRLLGGVWRADSHDDV...TGRCGNDTGISPLAAGVEYALTKNWATRLDQWNNIGDAGTVGARPDNGLSLGVSYRFGQETPAPVPAAPVPAAPAP
455420285.pir  VAVAAFASVVAQAAPKDNWTYAGKLGWSQYQNTGTGFDGESLNgPVHKDLGAGIYAGQHNYMGFELGYDNLGRMPKYGSDNGGAFKAQGVQLTAKLSYPIADDLDIYVYGRLLGGVWRADATASY...NGERIKDHDTGVSPLFALGTETTRDIAARVEYQWNNIGDKETTMARPDNGLSLGVSYRFGQDEAAPVIAEPAPVPAAPV
VILVGFATVAQAAPKDNWTYAGKLGWSQYQDGT...SIIINDNGPETHESQLGAGAFGGYQANPYLGFEMGYDNLGRMPKYGSDINGGAFKAQGVQLAALKSYPIA...LDIYVYGRLLGVWRADAKGFSDDGLDRASGHTGVSPLAAGVEYALTKNWATRLMEYQWNNIGDRBTVGARPDNGLSLGVSYRFGQDEAAPVIAPTAPAPAI
668658916.pir  VALAGFATVAQAAPKDNWTYAGKLGWSQYHDTGFYGNMGYTDN...DARKDQLGAGAFGLGYQANPYLGFELGYDNLGRMPKMYTGE...RNTGSGFAQGVQLAALKSYPIADDLDIYVYGRLLGGVWRADSGV...GNSGNDHDTGVSPLAAGVEYALTKNWATRLDQWNNIGDAGTVGARPDNTATSLGVSYRFGQDTPVAPAPAPAPV
561565430.pir  IAVAAGFATVAQAAPKDNWTYAGKLGWSQYHDTGLNGSGYQYTDN...EQAGNQLGAGAFGLGYQANPYLGFEMGYDNLGRMPKMYTGE...NRGNFKAQGVQLAALKSYPIADDLDIYVYGRLLGGVWRADSHDDV...SGNSGHTDGVSPALAGVEYALTKNWATRLDQWNNIGDAGTVGARPDNGLSLGVSYRFGQDEAPVIAAPVPAAPV
194682162.pir  VAVAAFTAAQAAPKDNWTYAGKLGWSQYQSTNNNDGWNINNGSTHESQLGAGAFGLGYQANPYLGFELGYDNLGRMPKYGVSVDNGGAFKAQGVQLTAKLSYPIADDLDIYVYGRLLGGVWRADSTATINAKRFSNHDGTGVSVPFALGTETTAIATRLLEYQWNNIGDKGTINARPDNGLSLGVSYRFGQETPAPVPAAPVPAAPV
498975325.pir  VALAGFATVAQAAPKDNWTYAGKLGWSQYHDTG...FINNNNGPETHESQLGAGAFGGYQANPYVPGFEMGYDNLGRMEYKghgNQGAFAQGVQLTAKLSYPIADDLDIYVYGRLLGGVWRADTSSNATG...RKHKDHDTGVAPFAGGVEYAITPQIATRLLEYQWNNIGDRSEIETRPDNGLSLGVSYRFGQDEAAPVIAEPAPAVEQ
497991444.pir  VALASAFATIAQAAPKDNWTYAGKLGWSQYHDTGFYGNMGYTNVNNPIKSKLGAGAFGLGYQANPYLGFELGYDNLGRMPKMYAGTSNVAFAQGIQLAALKSYPIADDLDIYVYGRLLGGVWRADSHAAL...GGGDNINDDTGVSPLAAGVEYALTKNWATRVDYQWNNIGDAGTVGARPDNTATSLGVSYRFGQDDAVPVAAPVPAAPV
558649082.pir  VAVAAFTAAQAAPKDNWTYAGKLGWSQYQDTSNHFGETSIGNNGPETHESQLGAGAFGLGYQANPYLGFELGYDNLGRMPKYGVSVDNGGAFKAQGVQLTAKLSYPIADDLDIYVYGRLLGGVWRADSSATYaatKJNFSNHDGTGVSVPFALGTETTAIATRLLEYQWNNIGDKGTINARPDNGLSLGVSYRFGQETPAPVVAAPVPAAPV
666391907.pir  VALAGFATVAQAAPKDNWTYAGKLGWSQYHDTG...VDGAIANGPETHESQLGAGAFGLGYQANPYMGFEMGYDNLGRMPKMYKGNVNGGAFKAQGVQLTAKLSYPIADDLDIYVYGRLLGGVWRADSVYafgghnERVSGDDTGVSPLAAGVEYALTQNNWATRLDQWNTSNIGDAVTGVARPDNGLSLGVSYRFGQDTPAPVPAAPVPAAPV
549989173.pir  VALAGFATVAQAAPKDNWTYAGKLGWSQYHDTGLTNGGYNVNTAAQ...NQLGAGAFGGYQANPYLGFEMGYDNLGRMPKMYNG...GNQGSFKAQGVQLAALKSYPIADDLDIYVYGRLLGGVWRADSHDN...SLGNDHDTGVSPLAAGVEYALTKNWATRLDQWNNIGDAGTVGARPDNGLSLGVSYRFGQDEATAPAVLIAAAPT
640732380.pir  VAVAAFASVVAQAAPKDNWTYAGKLGWSQYQNTG...STIGNTGPTHESQLGAGAFGLGYQANPYMGFELGYDNLGRMPKYGSDENNGGAFKAQGVQLTAKLSYPIADDLDIYVYGRLLGGVWRADSSYSTPANTQYTNNDTGVSPLFALGTETTRDIAARVEYQWNNIGDKETTLMARPDNGLSLGVSYRFGQDEAAPVIAEPVPAAPV
585872404.pir  VALAGFATVAQAAPKDNWTYAGKLGWSQYHDTGFYGNMGYTGNNNPIKSKLGAGAFGLGYQANPYLGFELGYDNLGRMPKMYAGaSDASFAQAGIQLAALKSYPIADDLDIYVYGRLLGVWRADSHADRS...GTHANNHDTGVSPLAAGVEYALTKNWATRVDYQWNNIGDKETTLVGARPDNGLSLGVSYRFGQDDAVPVAAPVPAAPV
542100660.pir  VALAGFATVAQAAPKDNWTYAGKLGWSQYHDTAGMNGNGYQYTN...DAQKDLGTGIFAGYQANPYLGFEMGYDNLGRMPKMYGA...NRGNFKAQGVQLAALKSYPIADDLDIYVYGRLLGGVWRADSSDD...ATGNSGHTDGVSPALAGVEYALTKNWATRLDQWNNIGDASTVGGRPDNMSLGVSYRFGQDDAAPVPAAPVPAAPV
VAVASAFATVAQAAPKDNWTYAGKLGWSHYEDTKFNPVDRNAGSvGTdARDQLGAGAFGLGYQANPYLGFELGYDNLGRMPKMYTGE...THNGSDGLSLKMGVSALTAKLSYPIADDLDIYVYGRLLGGVWRADTVANQA...GAYAHKNDTGVSPLAAGVEYALTKNWATRLDQWNNIGDNNISLGARPDNGLSLGVLAAYRFGQ...EAPVPAEPAPVPAAPV
VALAGFATVAQAAPKDNWTYAGKLGWSQYHDTSLYNGYRVSNNP...DESQGLGAGAFGLGYQANPYLGFELGYDNLGRMPKMYTGE...TYHGDYRAGVQLSAKLSYPIADDLDIYVYGRLLGGVWRADSSNSIA...LGHNSNDTGVSPLAAGVEYALTKNWATRLDQWNNIGDAATVGGRPDNGLSLGVSYRFGQDDNVPVPAAPAPAPV
402279534.pir  ....AKLGWSYHDTGFYGNMGYQCNNGPETHESQLGAGAFGGYQANPYLGFEMGYDNLGRMPKYGVSVDNGGAFKAQGVQLTAKLSYPIADDLDIYVYGRLLGGVWRADSKGNYASTGVSRSBHDGTGVSVPFAGGVEAWTRDIAATRLLEYQWNNIGDAGTVGTRPNDGMSLGVSYRFGQDDAVPVAAPAPAPV
VAVAAFTVAQAAPKDNWTYAGKLGWSHYEDTKFtDNTGTSVNSTDRDITLGAAGAFGLGYQANPYMGFELGYDNLGRMPKMYKAGNSGDLSKMGVSALTAKLSYPIADDLDIYVYGRLLGGVWRADTVAHNDNN...KIKBNDTGVSVPFALGTETTAIATRLLEYQWNNIGDKBNLNGDGLSLGVLAAYRFGQ...EAPVPAEPAPVPAAPV
VAVAAFTVAQAAPKDNWTYAGKLGWSHYEDTSFTFPDRNTVTSQDTRDITFAGAAGAFGLGYQANPYMGFELGYDNLGRMPKMYKAGNSGDLSKMGVSALTAKLSYPIADDLDIYVYGRLLGGVWRADTVAH...QTEEBERYKNDTGVSVPFALGTETTAIATRLLEYQWNNIGDNDNLDNGVRPDNGLSLGVLAAYRFGQ...EAPVPAEPAPVPAAPV
491435098.pir  ....WYTGSLKWSQYHDTGFYGNMGFdnAGPETHESQLGAGAFGLGYQANPYLGFELGYDNLGRMPKYGVSVDNGGAFKAQGVQLAALKSYPIADDLDIYVYGRLLGGVWRADSKGAYDNGHNaVSDHDTGVSPLAAGVEYALTKNWATRLDQWNNIGDAGTVGTRPNDGMSLGVSYRFGQDEAVPAPVPAAPV
VALAGFATVAQAAPKDNWTYAGKLGWSQYHDTG...FINNNNGPETHESQLGAGAFGGYQANPYVPGFEMGYDNLGRMPKYGNDINGAFAQGVQLAALKSYPIADDLDIYVYGRLLGGVWRADTKANEP...GASFSKDHDTGVSVPFAGGVEYAFTEIATRLLEYQWNNIGDANTIGTRPDNGLSLGVSYRFGQDEAAPVVAAPAPAPV
647467296.pir  VALAGFATVAQAAPKDDTWTYAGKLGWSHYHDDT...INHFSNTVRPDQLGGAFGLGYQANPYLGFEMGYDNLGRMEYXGN...NNGAFKSGVQLAALKSYPIADDLDIYVYGRLLGGVWRADSGANSSTGYRIDSHTGVSPLAAGVEYALTKNWATRLDQWNNIGDANETARPDNTATSLGVSYRFGQDEAAPVVAAPAPAPV
414096252.pir  VAVAAFTVAQAAPKDNWTYAGKLGWSHYEDTGTDAYAGWTGVNSTDRDITLGAAGAFGLGYQANPYLGFELGYDNLGRMPKMYKAGNSGDLSKMGVSALTAKLSYPIADDLDIYVYGRLLGGVWRADTEAKHAG...NGERFKDHDTGVAPFALGTETTAIATRLLEYQWNNIGDKDNTIGTRPDNGLSLGVSYRFGQDDAVPVAAPVPAAPV
653021557.pir  VALAGFATVAQAAPKDNWTYAGKLGWSHYHDDTGFY...NKYASGADTHPHQLGAGAFGLGYQANPYLGFELGYDNLGRMTYRGD...DASAYKAQGIQLAALKSYPIADDLDIYVYGRLLGAMGWGRDTPHAAFGQY...KDHETGVSPLAAGVEYALTTPSLATRLDQWNNIGDASVGTTRPDNGLSLGVLAAYRFGQDKTPAPAVIAPVQTKR
284007554.pir  VAVAAFTAAQAAPKDNWTYAGKLGWSHFEDTGPHPYGDVNGSGKTRDQLGAGAFGLGYQANPYLGFELGYDNLGRMPKMYKSGQPNNGSLSKMGVQLTAKLSYPIADDLDIYVYGRLLGGVWRADKANVE...NOPSRKDHDTGVSVPFALGTETTAIATRLLEYQWNNIGDKDNTIGTRPDNGLSLGVSYRFGQDEAPVVAAPVPAAPV
416488456.pir  VALAGGAFATVAQAAPKDNWTYAGKLGWSHFISNFS...EDMGTTKPHPNQLGAGAFGLGYQANPYLGFEMGYDNLGRMPKMYTGDV...NAKFSQGVQLAALKSYPIADDLDIYVYGRLLGGVWRADSHGAAD...GGDYTSBHDGTGVSPLAAGVEYALTKNWATRLDQWNNIKVGRSRTSGARPDNTATSLGVSYRFGQDEAAPVIAEPAPAPV
385191048.pir  IAVAALASVAQAAPQNTFYAGVKAGASFDGKIKANTDASfTgTYGVGGYQINLGLAVLELGYDDPFRKAGKFDAGVakHTNHAHLSLSKSGYEL1EGDVGVRGGAALRSYDQKYDTSAGRqgBHSLRVSPMPFAAGVEYALT1PELALRVEYQWLRVKGRLtvdYDNPWIGSINAGLSYRFGQ...AAPVPAEPVVSKTFF
288225941.pir  ....YTAKLGWSQYHDKGYGNSGYQDNDGSPHESQLGAGAFGLGYQANPYLGFELGYDNLGRMPKYGVSVDNGGAFKAQGVQLAALKSYPIADDLDIYVYGRLLGVWRVSDTQQV...GGDRISNHDGTGVSPLAAGVEYALTKNWATRLDQWNNIGDAGTVGARPDNTATSLGVSYRFGQDEAAPVVAAPVVEIK
VALAGFATVAQAAPKDNWTYAGKLGWSQYHDTGWY...NSSLNDNGPETHESQLGAGAFGGYQANPYVPGFEMGYDNLGRMPKYGVSVDNGGAFKAQGVQLTAKLSYPIADDLDIYVYGRLLGGVWRADSSNSIA...GDDHDTGVSVPFAGGVEAWTRDIAATRLLEYQWNNIGDMTGVGTTRPDNGLSLGVSYRFGQDEAAPVVAAPAPAPV
517168214.pir  VAGLAAFTSVAQAAPQNTFYVGAAGWASFDGLGQKshvngGRNNSVTYGVGGYQINLGLAVLELGYDDPFRKAGKFKGKVSvHTNHAHLSLSKSGYELVBLGDVGRAGAALRSYDQKNAKVGqgKdASHLSKRVSPFAAGVEYALT1PELALRVEYQWLASGVKDNK1dYDNPWIGSVTAGLSYRFGQ...APVPAEPVVSKTFF
491435098.pir  VALAGFATVAQAAPKDDTWTYAGKLGWSHYIGNSFENNMD...STKSHPNRPNQLGAGAFGLGYQANPYLGFEMGYDNLGRMXYTGDV...NGKFAQGIQLAALKSYPIADDLDIYVYGRLLGGVWRADSHADSA...TDVYSGHDTGVSPLAAGVEYALTKNWATRLDQWNNIKGTSSTQGARPDNTATSLGVSYRFGQDDAVPAPVPAAPV
610156596.pir  VAGLAAASVAQAAPQNTFYVGAAGLASFDGKIKANTDAtfTgTYGNRNSVTYGVGGYQINLGLAVLELGYDDPFRKVKPDKATVktHTNNGHSTLSKSGYELBGLDVGVRAGAALRSYDQKYDTEGArqgRHSLSRVSPFAAGVEYALT1PELALRVEYQWLRVKGRLtvdYDNPWIGSINAGLSYRFGQ...AAPVPAEPVVSKTFF
560550576.pir  MAFAPQNTFYVGAAGKATVAGKWSHYHDTGFTGFTDNLNNDOPH...QLGAGAYMGAYQANPYLGFELGYDNLGRMTYRGDA...DSGAFQAGIQLAALKSYPIADDLDIYVYGRLLGAMGWADTT...YHPTSGGHEHDTGVSPLAAGVEYAFTEIATRLDQWNNIGDGSITGRPDNTATSLGVSYRFGQDTPAPVPAAPVPAAPV
VAGLAAASVAQAAPQNTFYVGAAGKAGASFDGKIKANTDAtfTgTYGNRNSVTYGVGGYQINLGLAVLELGYDDPFRKAGKFKHNGTtFKHTNNGHSTLSKSGYELBGLDVGVRAGAALRSYDQKNAKVGqgBHSLSRVSPFAAGVEYALT1PELALRVEYQWLRVKGRLtvdYDNPWIGSINAGLSYRFGQ...AAPVPAEPVVSKTFF
652755191.pir  IAVLAAASVAQAAPQNTFYVGAAGKAGASFDGLGTfDPAKDNngYINRNSVTYGVGGYQINLGLAVLELGYDYGVRVGRNTtKRAAKHTAHGALSLSKSYBETLNPDKVYGVGVALRSDYqkVNVKDSLRKAKHLKPSLLIGAGLEYALT1PELALRVEYQWLRVKGRLtvdYDNPWIGSHVSAAGLSYRFGQ...AAPVEAPEVVTKFN
532965072.pir  VALAGFATVAQAAPKDNWTYAGKLGWSQYQNSG...SIIINDNGPETHESQLGAGAFGLGYQANPYLGFEMGYDNLGRMPKYGDTNNGGAFKAQGVQLAALKSYPIA...LDIYVYGRLLGGVWRADAGSI...GGVRNSNHDGTGVSPLAAGVEYALTKNWATRLMEYQWNNIGDRAVTGARPDNGLSLGVSYRFGQDEAAPVVAAPAPAPV

```

07586193.pir  
075850166.pir  
048091927.pir  
043393839.pir  
073500222.pir  
048200765.pir  
0478134155.pir  
047533723.pir  
047605235.pir  
040383034.pir  
04258870.pir  
041949621.pir  
041567784.pir  
02650272.pir  
07544312.pir  
042595864.pir  
066852754.pir  
0488301.pir  
043480425.pir  
049773255.pir  
029981200.pir  
044963631.pir  
048795016.pir  
009968918.pir  
041952950.pir  
075442127.pir  
071768215.pir  
09032472.pir  
047813888.pir  
047533937.pir  
06685258.pir  
040295730.pir  
071575242.pir  
048690518.pir  
048690800.pir  
048001059.pir  
0486902687.pir  
059556031.pir  
0282118233.pir  
048690795.pir  
046397593.pir  
060094727.pir  
048138887.pir  
028519234.pir  
0482293846.pir  
03217549.pir  
048474314.pir  
060631448.pir  
041950755.pir  
048690832.pir  
049773237.pir  
020577074.pir  
02307325.pir  
06397578.pir  
041485360.pir  
05040440.pir  
071742871.pir  
068825896.pir  
028812696.pir  
064571900.pir  
099056673.pir  
048740949.pir  
0874270.pir  
069488134.pir  
068959406.pir  
018275551.pir  
075563355.pir  
09182348.pir  
042850002.pir  
046413379.pir  
0872471.pir  
048450279.pir  
06892613.pir  
04621651.pir  
015535950.pir  
051333110.pir  
091421697.pir  
0999067302.pir  
016391880.pir  
094988135.pir  
094973716.pir  
05105662.pir  
040047182.pir



363984851.pir LVITGTFATLQAAPKNNNTWYIGSKLWGSDEHDILSLFSTFNNNNSTHNKHLGAGAFFGYQANKYLGFIEYDWLGRMTYKGSLLYNGAIKLQGVQLAAKLSYPIIDNLDIYTRFGMMVWHQHSKYNYE.NAPYLSSSDGTGVIPLTAIGVEYALTKNLATRLDQYFIRNNHNgIISTDLNTMLSIGISYHFSQKNTINPIVTPPENITTI  
213950522.pir .DSFYVGAKAGWATFRNDINQIDSKYANDagISRNISVTYGVGGYQIIDNLAVELGYVYFGRVGRGKEFRAPKHSAGHTHLSLKPSYEVNLNGDVGKVGGAALVRNDKRYYSQTAgqQKAHNLKTSILVLGAGVEYAILPELAFRVEYQWLSNVGhrATYNYSPDHSVTAGISYRFQGAAPVAAAPAEVVTKNF  
615136045.pir LVSGLLAANAQAAGQDNTWYGGAKLGWSFYGVGD..ESNAITITDKDDDEVGAGAFAGYQINQNGELGYDLGKLYKSGSTRNGAAfeAQLAQITLQFGFPVADNLDLYGRGGYGVTDSDQL.....ENDSRFTFVGAIGAEYAFNLNDWAARLEYQYSTPYGSRDDTGLRMDNGLLSLAAVYRFQGVAPAAVPAPEPVE  
615550405.pir LVSGLLAANAQAAGQDNTWYGGAKLGWSFYGVGD..ESNAITITDKDDDEVGAGAFAGYQINQNGELGYDLGKLYKSGSTRNGAAfeAQLAQITLQFGFPVADNLDLYGRGGYGVTDSDQL.....DSDRAVFPVGAIGAEYAFNLNDWAARLEYQYSTPYGSRDDTGLRMDNGLLSLAAVYRFQGVAPAAVPAPEPVE  
485943435.pir .MLVANAQAAGQDNTWYGGAKLGWSFYGVGDHNDIAKDAadDESNDALGAGAFAGYQINQNGELGYDLGKLYKSGSTRNGAAfeAQLAQITLQFGFPVADNLDLYGRGGYGVTDSDQL.....RELDNDGGAAPVGAIGAEYAFNLNDWAARLEYQYSTPYGSRDDTGLRMDNGLLSLAAVYRFQGAAPVAAVPAPEPVE  
668967619.pir VINACAVTANAANAADNTWYGGAKLGWSYSDISGNNNFNNGNQNIDTSDNVGGGVFWGYQILPWLAIEGSDYDLGNMVOVQNGNGGKKAQGLQFSMKASYSFENNNDIYGRAGAMVRAETBQA.....EHSNFTGVRPLAAGIEYAFNLNDWAARLEYQYSTPYGSRDDTGLRMDNGLLSLAAVYRFQGVAPAAVPAPEPVE  
320577124.pir .GFYGNNGEIRIDGGFTDRNQLGAGAFVGHQANGLYFELGYDNLGRIAYKSGSNFSFAQAQISLAAKLSYPIIDNLDIYTRFGMMVWHQHSKYNYE.ISDHSTISPEMAAGVEYAFNLNDWAARLEYQYSTPYGSRDDTGLRMDNGLLSLAAVYRFQGVAPAAVPAPEPVE  
518678632.pir VSGLLYSVGAQQAADNTWYVGGKAGWSFYGVGDYKQAVUIDLKHSDLGVGAFVGYQILNPNLIEFELGYDNLGRIAYKSGSNFSFAQAQISLAAKLSYPIIDNLDIYTRFGMMVWHQHSKYNYE.ISDHSTISPEMAAGVEYAFNLNDWAARLEYQYSTPYGSRDDTGLRMDNGLLSLAAVYRFQGVAPAAVPAPEPVE  
320577116.pir .GAGAFPGYQANPLYFGLGYDNLGRIAYKSGSNFSFAQAQISLAAKLSYPIIDNLDIYTRFGMMVWHQHSKYNYE.ISDHSTISPEMAAGVEYAFNLNDWAARLEYQYSTPYGSRDDTGLRMDNGLLSLAAVYRFQGVAPAAVPAPEPVE  
667705883.pir AVASLTATAANAAYEDNTFYVGGKLGWSDFdyANKVRAYESASIKTSDHSNIAGGFIQGANPLYFGLGYDNLGRIAYKSGSNFSFAQAQISLAAKLSYPIIDNLDIYTRFGMMVWHQHSKYNYE.ISDHSTISPEMAAGVEYAFNLNDWAARLEYQYSTPYGSRDDTGLRMDNGLLSLAAVYRFQGVAPAAVPAPEPVE  
530712460.pir LVSGLLAANAHAAGQDNTWYGGAKLGWSNFYGVDEHNITITSLND..DNDEVGAGAFAGYQVQNGELGYDLGKLYKSGSTRNGAAfeAQLAQITLQFGFPVADNLDLYGRGGYGVTDSDQL.....DNDGRNFVGAIGAEYAFNLNDWAARLEYQYSTPYGSRDDTGLRMDNGLLSLAAVYRFQGVAPAAVPAPEPVE  
435333715.pir .AGAFPGYQVNPYVGFEMGYDNLGRIAYKSGSNFSFAQAQISLAAKLSYPIIDNLDIYTRFGMMVWHQHSKYNYE.ISDHSTISPEMAAGVEYAFNLNDWAARLEYQYSTPYGSRDDTGLRMDNGLLSLAAVYRFQGVAPAAVPAPEPVE  
637111975.pir AVASLTATAANAAYEDNTFYVGGKLGWSRLYRLDagFDKDEVGITKTSNRNVAGGAFVGHQANPLYFGLGYDNLGRIAYKSGSNFSFAQAQISLAAKLSYPIIDNLDIYTRFGMMVWHQHSKYNYE.ISDHSTISPEMAAGVEYAFNLNDWAARLEYQYSTPYGSRDDTGLRMDNGLLSLAAVYRFQGVAPAAVPAPEPVE  
646675997.pir AVASLTATAANAAYEDNTFYVGGKLGWSRLYRLDagFDKDEVGITKTSNRNVAGGAFVGHQANPLYFGLGYDNLGRIAYKSGSNFSFAQAQISLAAKLSYPIIDNLDIYTRFGMMVWHQHSKYNYE.ISDHSTISPEMAAGVEYAFNLNDWAARLEYQYSTPYGSRDDTGLRMDNGLLSLAAVYRFQGVAPAAVPAPEPVE  
480572252.pir MIAGSFAATQAAGQDNTWYGGAKLGWSFYGVGDYDPAPTAAGIDTESKDDVGLGALVGYQNLNPLIEFELGYDNLGRIAYKSGSNFSFAQAQISLAAKLSYPIIDNLDIYTRFGMMVWHQHSKYNYE.ISDHSTISPEMAAGVEYAFNLNDWAARLEYQYSTPYGSRDDTGLRMDNGLLSLAAVYRFQGVAPAAVPAPEPVE  
59809980.pir AVASLTATAANAAYEDNTFYVGGKLGWSRLYRLDagFDKDEVGITKTSNRNVAGGAFVGHQANPLYFGLGYDNLGRIAYKSGSNFSFAQAQISLAAKLSYPIIDNLDIYTRFGMMVWHQHSKYNYE.ISDHSTISPEMAAGVEYAFNLNDWAARLEYQYSTPYGSRDDTGLRMDNGLLSLAAVYRFQGVAPAAVPAPEPVE  
497507607.pir LLGLLLTGASQAAPDDHSWYLGAKAGWSNFYDADTRLVLEEIQRLQSDYDGLGLFAGYQNLNPLIEFELGYDNLGRIAYKSGSNFSFAQAQISLAAKLSYPIIDNLDIYTRFGMMVWHQHSKYNYE.ISDHSTISPEMAAGVEYAFNLNDWAARLEYQYSTPYGSRDDTGLRMDNGLLSLAAVYRFQGVAPAAVPAPEPVE  
664678209.pir AVASLTATAANAAYEDNTFYVGGKLGWSRLYRLDagFDKDEVGITKTSNRNVAGGAFVGHQANPLYFGLGYDNLGRIAYKSGSNFSFAQAQISLAAKLSYPIIDNLDIYTRFGMMVWHQHSKYNYE.ISDHSTISPEMAAGVEYAFNLNDWAARLEYQYSTPYGSRDDTGLRMDNGLLSLAAVYRFQGVAPAAVPAPEPVE  
550214112.pir MNVAFPTASFAAADAQWTWYGGAKGWSHYSDITMNGSKADNNNSdEDHNVGGGVGYQNTPLWLAIEGSDYDLGNMVOVQNGNGGKKAQGLQFSMKASYSFENNNDIYGRAGAMVRAETBQA.....EHSNFTGVRPLAAGIEYAFNLNDWAARLEYQYSTPYGSRDDTGLRMDNGLLSLAAVYRFQGVAPAAVPAPEPVE  
226344125.pir .DTGFTNNNGSTHENQJLGAAGFAGGYQVNPYVGFEMGYDNLGRIAYKSGSNFSFAQAQISLAAKLSYPIIDNLDIYTRFGMMVWHQHSKYNYE.ISDHSTISPEMAAGVEYAFNLNDWAARLEYQYSTPYGSRDDTGLRMDNGLLSLAAVYRFQGVAPAAVPAPEPVE  
392326470.pir LANAFATATTAFAAAADAGTWYSGAKFGWSHYDASTGSKASDNNSdEDHNVGGGVGYQNTPLWLAIEGSDYDLGNMVOVQNGNGGKKAQGLQFSMKASYSFENNNDIYGRAGAMVRAETBQA.....EHSNFTGVRPLAAGIEYAFNLNDWAARLEYQYSTPYGSRDDTGLRMDNGLLSLAAVYRFQGVAPAAVPAPEPVE  
480559860.pir VPALLVHGMAQAQAV.ENTWYAGAGKNGWSNYdPQIBQLERESKSNNTSDDLGVGGFIQYQLNLAIEGSDYDLGTYQVGVSLHGEQAGMQLQATMRISGAASDITGLYGRLLGAYWTDsaAVSSLSGAANAQASBSPFALGVCEYITIDANWAARLEYQYSTPYGSRDDTGLRMDNGLLSLAAVYRFQGVAPAAVPAPEPVE  
254751405.pir .ATAAPQNTFYVAGAKWASFPDGIKQLDATHNYGINKSYDAGFAGYQILFGLATVEGYQDQGRVRHQNTAgqKHSAGHTITALKPSYEVLDNLDVYGVGIALVNRKYTVKPTKTSQAFSILGVCEYITIDANWAARLEYQYSTPYGSRDDTGLRMDNGLLSLAAVYRFQGVAPAAVPAPEPVE  
485941458.pir IGATCTSGSLQAQALDNSWYLGKAGWSHYFGADFPDIDEafgAVBQGGDLGLFVGYQILNPNLIEFELGYDNLGRIAYKSGSNFSFAQAQISLAAKLSYPIIDNLDIYTRFGMMVWHQHSKYNYE.ISDHSTISPEMAAGVEYAFNLNDWAARLEYQYSTPYGSRDDTGLRMDNGLLSLAAVYRFQGVAPAAVPAPEPVE  
637117075.pir .YGGAKLGWSNFYGVGDHNDIADKDAISEEDKNDGAGAFAGYQVQNGELGYDLGKLYKSGSTRNGAAfeAQLAQITLQFGFPVADNLDLYGRGGYGVTDSDQL.....DNDGGAAPVGAIGAEYAFNLNDWAARLEYQYSTPYGSRDDTGLRMDNGLLSLAAVYRFQGVAPAAVPAPEPVE  
639154778.pir VAIASLTSAAHAAQAPNTFYVAGKNGWSFHHAG..LGDDPKDDVGGGFLVGYQANPLYFGLGYDNLGRIAYKSGSNFSFAQAQISLAAKLSYPIIDNLDIYTRFGMMVWHQHSKYNYE.ISDHSTISPEMAAGVEYAFNLNDWAARLEYQYSTPYGSRDDTGLRMDNGLLSLAAVYRFQGVAPAAVPAPEPVE  
459649431.pir VAGLAAASVAQAAPQNTFYVAGVKAGQGSFDDGNNGGaisTNYGYRRNTFTYGVGGYQILNPNLIEFELGYDNLGRIAYKSGSNFSFAQAQISLAAKLSYPIIDNLDIYTRFGMMVWHQHSKYNYE.ISDHSTISPEMAAGVEYAFNLNDWAARLEYQYSTPYGSRDDTGLRMDNGLLSLAAVYRFQGVAPAAVPAPEPVE  
320577090.pir .NPLYGELGYDNLGRIAYKSGSNFSFAQAQISLAAKLSYPIIDNLDIYTRFGMMVWHQHSKYNYE.ISDHSTISPEMAAGVEYAFNLNDWAARLEYQYSTPYGSRDDTGLRMDNGLLSLAAVYRFQGVAPAAVPAPEPVE  
410370131.pir IAHAFATATAFAAAATGTWYAGSKFGWSHYGDS..TDQRVDVDRNVGGGVGYQNTPLWLAIEGSDYDLGNMVOVQNGNGGKKAQGLQFSMKASYSFENNNDIYGRAGAMVRAETBQA.....EHSNFTGVRPLAAGIEYAFNLNDWAARLEYQYSTPYGSRDDTGLRMDNGLLSLAAVYRFQGVAPAAVPAPEPVE  
444983177.pir .MAQLKNNLRLTISYGYRRNTFTYGVGGYQILNPNLIEFELGYDNLGRIAYKSGSNFSFAQAQISLAAKLSYPIIDNLDIYTRFGMMVWHQHSKYNYE.ISDHSTISPEMAAGVEYAFNLNDWAARLEYQYSTPYGSRDDTGLRMDNGLLSLAAVYRFQGVAPAAVPAPEPVE  
541135496.pir VAGLAAASVAQAAPQNTFYVAGVKAGQGSFDDGLRALA..REKNYGYRRNTFTYGVGGYQILNPNLIEFELGYDNLGRIAYKSGSNFSFAQAQISLAAKLSYPIIDNLDIYTRFGMMVWHQHSKYNYE.ISDHSTISPEMAAGVEYAFNLNDWAARLEYQYSTPYGSRDDTGLRMDNGLLSLAAVYRFQGVAPAAVPAPEPVE  
541135500.pir VAGLAAASVAQAAPQNTFYVAGVKAGQGSFDDGV..RANGKLPSSGHYRRNTFTYGVGGYQILNPNLIEFELGYDNLGRIAYKSGSNFSFAQAQISLAAKLSYPIIDNLDIYTRFGMMVWHQHSKYNYE.ISDHSTISPEMAAGVEYAFNLNDWAARLEYQYSTPYGSRDDTGLRMDNGLLSLAAVYRFQGVAPAAVPAPEPVE  
328492295.pir LPLALLISGAVNAATNFYVAGVRGAVHYADFDSKNYAAGTYGNIIRDDEFAAGLFGYQNTWPFAIEGSGYTWLGEVTLKGDKQGVKEVQLADDLVGKFIYQATDKVDLYTKVGGAGQTRSKGLP..GOTTDDDLSLIATAGAGVEYAFNLNDWAARLEYQYSTPYGSRDDTGLRMDNGLLSLAAVYRFQGVAPAAVPAPEPVE  
151567739.pir .MPKNDQNTFYVAGKLGWSYYS..RENQJLGAAGFAGGYQVNPYVGFEMGYDNLGRIAYKSGSNFSFAQAQISLAAKLSYPIIDNLDIYTRFGMMVWHQHSKYNYE.ISDHSTISPEMAAGVEYAFNLNDWAARLEYQYSTPYGSRDDTGLRMDNGLLSLAAVYRFQGVAPAAVPAPEPVE  
90441030.pir LPLALLISGAVNAATNFYVAGVRAGGVHYSDFDsaNGTYGSGAGGVDRDDFAAGVFMGYNTWPFAIEGSGYTWLGEVTSKYDeSdskIEBQQAIDLVGKFIYQATDKVDLYTKVGGAGQTRAKGLP..GQTATDRDLSLIATAGLAEYHFTDNLSARAERYQYHNMEKPTGTDTKIndANYGVSLVYWGAGAPVPAVPAPEPVE  
239950061.pir .NGVGINRDSVTYGVGGYQIIDNLAVELGYVYFGRVGRGKEFRAPKHSAGHTHLSLKPSYEVNLNGDVGKVGGAALVRNDKRYYSQTAgqQKAHNLKTSILVLGAGVEYAILPELAFRVEYQWLSNVGhrATYNYSPDHSVTAGISYRFQGAAPVAAAPAEVVTKNF  
904842848.pir LPLALLISGAVNAATNFYVAGVRAGGVHYSDFDskNYAGTNRNALIRDDEFAAGLFGYQNTWPFAIEGSGYTWLGEVTSKYDeSdskIEBQQAIDLVGKFIYQATDKVDLYTKVGGAGQTRAKGLP..GQTATDRDLSLIATAGLAEYHFTDNLSARAERYQYHNMEKPTGTDTKIndANYGVSLVYWGAGAPVPAVPAPEPVE  
326346124.pir .MGYDNLGRIAYKSGSNFSFAQAQISLAAKLSYPIIDNLDIYTRFGMMVWHQHSKYNYE.ISDHSTISPEMAAGVEYAFNLNDWAARLEYQYSTPYGSRDDTGLRMDNGLLSLAAVYRFQGVAPAAVPAPEPVE  
363642983.pir VALAGFAIVAQAAPKDNNTWYTGAKLGWSFHDIG..NNRIDNNNGPHEESQLGAGAFAGGYQVNPYVGFEMGYDNLGRIAYKSGSNFSFAQAQISLAAKLSYPIIDNLDIYTRFGMMVWHQHSKYNYE.ISDHSTISPEMAAGVEYAFNLNDWAARLEYQYSTPYGSRDDTGLRMDNGLLSLAAVYRFQGVAPAAVPAPEPVE  
903242929.pir LPLALLISGAVNAATNFYVAGVRAGGVHYSDFD..GLGPAQIDKEDWGGVFLGYQINWPFAIEGSGYTWLGEVTSKYDeSdskIEBQQAIDLVGKFIYQATDKVDLYTKVGGAGQTRAKGLP..GQTATDRDLSLIATAGLAEYHFTDNLSARAERYQYHNMEKPTGTDTKIndANYGVSLVYWGAGAPVPAVPAPEPVE  
441428083.pir LPVLLISGVSHTAADNFVAGARVGGTGYSDFD..GAFEDRDNWGGGAFGYGYNWFAIEGSGYTWLGEVTSKYDeSdskIEBQQAIDLVGKFIYQATDKVDLYTKVGGAGQTRAKGLP..GQTATDRDLSLIATAGLAEYHFTDNLSARAERYQYHNMEKPTGTDTKIndANYGVSLVYWGAGAPVPAVPAPEPVE  
358410520.pir LPLAVCLSDVAHTAADNFVAGARVGGTGYSDFD..GAFEDRDNWGGGAFGYGYNWFAIEGSGYTWLGEVTSKYDeSdskIEBQQAIDLVGKFIYQATDKVDLYTKVGGAGQTRAKGLP..GQTATDRDLSLIATAGLAEYHFTDNLSARAERYQYHNMEKPTGTDTKIndANYGVSLVYWGAGAPVPAVPAPEPVE  
46915744.pir LPLALLISGAVNAATNFVAGARVGGTGYSDFD..GAFEDRDNWGGGAFGYGYNWFAIEGSGYTWLGEVTSKYDeSdskIEBQQAIDLVGKFIYQATDKVDLYTKVGGAGQTRAKGLP..GQTATDRDLSLIATAGLAEYHFTDNLSARAERYQYHNMEKPTGTDTKIndANYGVSLVYWGAGAPVPAVPAPEPVE  
387936435.pir LMLAAASSVNVADNAGVGLGNGIDNADINRITENLLDGLSDDRDTGLKPSFGYQNNRPAIEGSGYTWLGEVTSKYDeSdskIEBQQAIDLVGKFIYQATDKVDLYTKVGGAGQTRAKGLP..GQTATDRDLSLIATAGLAEYHFTDNLSARAERYQYHNMEKPTGTDTKIndANYGVSLVYWGAGAPVPAVPAPEPVE  
90441027.pir LPLALVTSVVSATNFYVAGARLGAGHYSN..FQONYQDITGILNMLKDDVAAGVAGYNTWPFAIEGSGYTWLGEVTSKYDeSdskIEBQQAIDLVGKFIYQATDKVDLYTKVGGAGQTRAKGLP..GQTATDRDLSLIATAGLAEYHFTDNLSARAERYQYHNMEKPTGTDTKIndANYGVSLVYWGAGAPVPAVPAPEPVE  
268161022.pir PLALLISGAVNAATNFVAGARLGAGHYSN..FQONYQDITGILNMLKDDVAAGVAGYNTWPFAIEGSGYTWLGEVTSKYDeSdskIEBQQAIDLVGKFIYQATDKVDLYTKVGGAGQTRAKGLP..GQTATDRDLSLIATAGLAEYHFTDNLSARAERYQYHNMEKPTGTDTKIndANYGVSLVYWGAGAPVPAVPAPEPVE  
14331084.pir LVLGAGASMALASNVQGFVYVGGKAGTDFD..GANSLDCEBSEGFGVYQGLDVAIEGSGYTWLGEVTSKYDeSdskIEBQQAIDLVGKFIYQATDKVDLYTKVGGAGQTRAKGLP..GQTATDRDLSLIATAGLAEYHFTDNLSARAERYQYHNMEKPTGTDTKIndANYGVSLVYWGAGAPVPAVPAPEPVE  
90440061.pir LPLALFVSNSVHASTDNFWFVAGARAGASHITMD..DAVTSVTKLEDNTFAGVAGYQNTWPFAIEGSGYTWLGEVTSKYDeSdskIEBQQAIDLVGKFIYQATDKVDLYTKVGGAGQTRAKGLP..GQTATDRDLSLIATAGLAEYHFTDNLSARAERYQYHNMEKPTGTDTKIndANYGVSLVYWGAGAPVPAVPAPEPVE  
328490735.pir PLVTVSSLSIAHASTDNFWFVAGARAGASHITMD..DAVTSVTKLEDNTFAGVAGYQNTWPFAIEGSGYTWLGEVTSKYDeSdskIEBQQAIDLVGKFIYQATDKVDLYTKVGGAGQTRAKGLP..GQTATDRDLSLIATAGLAEYHFTDNLSARAERYQYHNMEKPTGTDTKIndANYGVSLVYWGAGAPVPAVPAPEPVE  
544135494.pir VAGLAAASVAQAAPQNTFYVAGVKAGQGSFDDGLRALA..REKNYGYRRNTFTYGVGGYQILNPNLIEFELGYDNLGRIAYKSGSNFSFAQAQISLAAKLSYPIIDNLDIYTRFGMMVWHQHSKYNYE.ISDHSTISPEMAAGVEYAFNLNDWAARLEYQYSTPYGSRDDTGLRMDNGLLSLAAVYRFQGVAPAAVPAPEPVE  
404623132.pir LALAAAGTQAQA..DDWTVGAGAGWAYHNLND..DVGLDQDKDATALSPFGGYNFENNYAELGYDLGKLYKSGSTRNGAAfeAQLAQITLQFGFPVADNLDLYGRGGYGVTDSDQL.....DNDGGAAPVGAIGAEYAFNLNDWAARLEYQYSTPYGSRDDTGLRMDNGLLSLAAVYRFQGVAPAAVPAPEPVE  
11986360.pir PLALLVSGAATAAaNTFYVAGARLGAGHYSN..FAENITVDPNDQNDLGAAGLFGYQNTWPFAIEGSGYTWLGEVTSKYDeSdskIEBQQAIDLVGKFIYQATDKVDLYTKVGGAGQTRAKGLP..GQTATDRDLSLIATAGLAEYHFTDNLSARAERYQYHNMEKPTGTDTKIndANYGVSLVYWGAGAPVPAVPAPEPVE  
893454005.pir LIALALTAGPLALDNLGAGVAGNRRSSTATIDARITSGLLGSLDNRSSGKIFPGYQNNRPAIEGSGYTWLGEVTSKYDeSdskIEBQQAIDLVGKFIYQATDKVDLYTKVGGAGQTRAKGLP..GQTATDRDLSLIATAGLAEYHFTDNLSARAERYQYHNMEKPTGTDTKIndANYGVSLVYWGAGAPVPAVPAPEPVE  
485941727.pir IATAAMATGATAAADDVYFGAGVAAHFNGLN..INGDDGTDEDAANAAPFVGYNTFENPGTEFGYAGR..GNTGSRVYENQATLSGLARPLGDDPSFAEGGAYWAHTDGLG..SDTKVSPLAGGLGVYKVNDAIDLQARYRYMMDVADLHADnyKSNQSVATLEAVYHPFRtsVAPVPAPEPVE  
328492298.pir LPLALISTASAAATNFYVAGVRGAGHYSN..FQONYQDVTGILNMLKDDVAAGLFGYQNTWPFAIEGSGYTWLGEVTSKYDeSdskIEBQQAIDLVGKFIYQATDKVDLYTKVGGAGQTRAKGLP..GQTATDRDLSLIATAGLAEYHFTDNLSARAERYQYHNMEKPTGTDTKIndANYGVSLVYWGAGAPVPAVPAPEPVE  
320577092.pir .LGRMAKYSVNNAGFAQAQISLAAKLSYPIIDNLDIYTRFGMMVWHQHSKYNYE.ISDHSTISPEMAAGVEYAFNLNDWAARLEYQYSTPYGSRDDTGLRMDNGLLSLAAVYRFQGVAPAAVPAPEPVE  
480569187.pir IATAALAAAGTTAA.QANDWTVGVTGWAMDRDLG..KFGMDADEDATINFLPGGYNFENNYAELGYDLGKLYKSGSTRNGAAfeAQLAQITLQFGFPVADNLDLYGRGGYGVTDSDQL.....DNDGGAAPVGAIGAEYAFNLNDWAARLEYQYSTPYGSRDDTGLRMDNGLLSLAAVYRFQGVAPAAVPAPEPVE  
369844096.pir TDASVWASSAFPAYQNGHYFLGARAGASHITMD..GSSANDDDTDFGYGAGGYQNFENNYAELGYDLGKLYKSGSTRNGAAfeAQLAQITLQFGFPVADNLDLYGRGGYGVTDSDQL.....DNDGGAAPVGAIGAEYAFNLNDWAARLEYQYSTPYGSRDDTGLRMDNGLLSLAAVYRFQGVAPAAVPAPEPVE  
569548869.pir IATAAMAAGATAAHAADDIYFGAGVGAHFNGLN..KIEGVNAGEEDAAAAAPFVGYNFENNYAELGYDLGKLYKSGSTRNGAAfeAQLAQITLQFGFPVADNLDLYGRGGYGVTDSDQL.....DNDGGAAPVGAIGAEYAFNLNDWAARLEYQYSTPYGSRDDTGLRMDNGLLSLAAVYRFQGVAPAAVPAPEPVE  
208009243.pir SLIGTICNANSTINDEDTIYIGKLIWTHFSNGC..ESQNDPCDKEAMGGVFLGYQINLWLAIEGSDYDLGNMVOVQNGNGGKKAQGLQFSMKASYSFENNNDIYGRAGAMVRAETBQA.....EHSNFTGVRPLAAGIEYAFNLNDWAARLEYQYSTPYGSRDDTGLRMDNGLLSLAAVYRFQGVAPAAVPAPEPVE  
480839290.pir AAGTITLIPASSAAVAEPVVGKIKGWSLDDAC..QSGQPCDKDDTLTGFAVGVEYANKLWSLIEAGYDLGKLYKSGSTRNGAAfeAQLAQITLQFGFPVADNLDLYGRGGYGVTDSDQL.....DNDGGAAPVGAIGAEYAFNLNDWAARLEYQYSTPYGSRDDTGLRMDNGLLSLAAVYRFQGVAPAAVPAPEPVE  
239950057.pir .ARXATSGNYYXXNRNVXGVYFGYQIIXIALVELGYVYFGRVGRGKXFRAPKHSAGHTHLSLKPSYEVNLNGDVGKVGGAALVRNDKRYYSQTAgqQKAHNLKTSILVLGAGVEYAILPELAFRVEYQWLSNVGhrATYNYSPDHSVTAGISYRFQGAAPVAAAPAEVVTKNF  
41632425.pir AAIISATLLIPASSAAVAEPVVGKIKGWSLDDAC..QAGSCDDDDVSGAFVGYQANKLWSLIEAGYDLGKLYKSGSTRNGAAfeAQLAQITLQFGFPVADNLDLYGRGGYGVTDSDQL.....DNDGGAAPVGAIGAEYAFNLNDWAARLEYQYSTPYGSRDDTGLRMDNGLLSLAAVYRFQGVAPAAVPAPEPVE  
569548871.pir IATAAAMGTSTAQAADDWYTGAGWAYGHDL..SFGLDKADKATALSPFGGYNFENNYAELGYDLGKLYKSGSTRNGAAfeAQLAQITLQFGFPVADNLDLYGRGGYGVTDSDQL.....DNDGGAAPVGAIGAEYAFNLNDWAARLEYQYSTPYGSRDDTGLRMDNGLLSLAAVYRFQGVAPAAVPAPEPVE  
404632559.pir IATAALAAGTGAAP.DNDWYGVGGVAAIAHDLG..DPGDKADKATALSPFGGYNFENNYAELGYDLGKLYKSGSTRNGAAfeAQLAQITLQFGFPVADNLDLYGRGGYGVTDSDQL.....DNDGGAAPVGAIGAEYAFNLNDWAARLEYQYSTPYGSRDDTGLRMDNGLLSLAAVYRFQGVAPAAVPAPEPVE  
404614684.pir IATAAMALGATAAHAADDIYFGAGVAAHFNGL..NKIDGCGYAGTDEDAANAAPFVGYNTFENPGTEFGYAGR..GNTGSRVYENQATLSGLARPLGDDPSFAEGGAYWAHTDGLG..SDTKVSPLAGGLGVYKVNDAIDLQARYRYMMDVADLHADnyKSNQSVATLEAVYHPFRtsVAPVPAPEPVE  
U3BN2D.pir AAVISASILLMSASAMQVXGKAVGTWLLDDAC..ISGQPCDDDDSTLGAAGVYENKPLFAIEGSDYDLGNMVOVQNGNGGKKAQGLQFSMKASYSFENNNDIYGRAGAMVRAETBQA.....EHSNFTGVRPLAAGIEYAFNLNDWAARLEYQYSTPYGSRDDTGLRMDNGLLSLAAVYRFQGVAPAAVPAPEPVE  
404632560.pir IATAAAMGTSTAQAADDWYTGAGWAYGHDL..DPGDKADKATALSPFGGYNFENNYAELGYDLGKLYKSGSTRNGAAfeAQLAQITLQFGFPVADNLDLYGRGGYGVTDSDQL.....DNDGGAAPVGAIGAEYAFNLNDWAARLEYQYSTPYGSRDDTGLRMDNGLLSLAAVYRFQGVAPAAVPAPEPVE  
651332619.pir IATAAAMGATAAHAADDIYFGAGVAAHFNGLN..KIEGVNAGEEDAAAAAPFVGYNTFENPGTEFGYAGR..GNTGSRVYENQATLSGLARPLGDDPSFAEGGAYWAHTDGLG..SDTKVSPLAGGLGVYKVNDAIDLQARYRYMMDVADLHADnyKSNQSVATLEAVYHPFRtsVAPVPAPEPVE  
530714709.pir IATAAMAAGATAAHAADDIYFGAGVAAHFNGLN..KIEGVNAGEEDAAAAAPFVGYNTFENNYAELGYDLGKLYKSGSTRNGAAfeAQLAQITLQFGFPVADNLDLYGRGGYGVTDSDQL.....DNDGGAAPVGAIGAEYAFNLNDWAARLEYQYSTPYGSRDDTGLRMDNGLLSLAAVYRFQGVAPAAVPAPEPVE  
480569188.pir IATAALAAMTATAAADDIYFGAGVAAHFNGL..NKIDGCGYAGTDEDAANAAPFVGYNTFENPGTEFGYAGR..GNTGSRVYENQATLSGLARPLGDDPSFAEGGAYWAHTDGLG..SDTKVSPLAGGLGVYKVNDAIDLQARYRYMMDVADLHADnyKSNQSVATLEAVYHPFRtsVAPVPAPEPVE  
485941726.pir IATAALAAGSTAAaADDWYTGAGWAYGHDLDPDKG..NADVDKADATALSPFGGYNTFENNYAELGYDLGKLYKSGSTRNGAAfeAQLAQITLQFGFPVADNLDLYGRGGYGVTDSDQL.....DNDGGAAPVGAIGAEYAFNLNDWAARLEYQYSTPYGSRDDTGLRMDNGLLSLAAVYRFQGVAPAAVPAPEPVE  
569548872.pir IATAALATSTAQAAP.AHDWYIGAGGWAYIAHND..DPSQDQDKDATALDPFVGYNTFENNYAELGYDLGKLYKSGSTRNGAAfeAQLAQITLQFGFPVADNLDLYGRGGYGVTDSDQL.....DNDGGAAPVGAIGAEYAFNLNDWAARLEYQYSTPYGSRDDTGLRMDNGLLSLAAVYRFQGVAPAAVPAPEPVE  
444791046.pir QAQAQEEFPVNDWANSAGLWAGVGRSRANIDGLANGATVAFNTDRTDYTGKLVQNGKLYLALIEGYDLGKLYKSGSTRNGAAfeAQLAQITLQFGFPVADNLDLYGRGGYGVTDSDQL.....DNDGGAAPVGAIGAEYAFNLNDWAARLEYQYSTPYGSRDDTGLRMDNGLLSLAAVYRFQGVAPAAVPAPEPVE  
262349585.pir AAIISATLLIPASSAAVAEPVVGKIKGWSLDDAC..QAGSCDDDDKATLGAAGVYENKPLFAIEGSDYDLGNMVOVQNGNGGKKAQGLQFSMKASYSFENNNDIYGRAGAMVRAETBQA.....EHSNFTGVRPLAAGIEYAFNLNDWAARLEYQYSTPYGSRDDTGLRMDNGLLSLAAVYRFQGVAPAAVPAPEPVE  
315179386.pir AMVVASILLMSASAMQVXGKAVGTWLLDDAC..NNTGSCDDDDTAGALLGYNFENNYAELGYDLGKLYKSGSTRNGAAfeAQLAQITLQFGFPVADNLDLYGRGGYGVTDSDQL.....DNDGGAAPVGAIGAEYAFNLNDWAARLEYQYSTPYGSRDDTGLRMDNGLLSLAAVYRFQGVAPAAVPAPEPVE  
342795449.pir LAVVISASILLMSASAMQVXGKAVGTWLLDDAC..KTNFVCDDDDSASAGIFPGYENFENDYALIEAGYDLGKLYKSGSTRNGAAfeAQLAQITLQFGFPVADNLDLYGRGGYGVTDSDQL.....DNDGGAAPVGAIGAEYAFNLNDWAARLEYQYSTPYGSRDDTGLRMDNGLLSLAAVYRFQGVAPAAVPAPEPVE  
530714708.pir IATAAAMGTSTAQAADDWYTGAGWAYGHDLN..DPGDKADKATALSPFGGYNFENNYAELGYDLGKLYKSGSTRNGAAfeAQLAQITLQFGFPVADNLDLYGRGGYGVTDSDQL.....DNDGGAAPVGAIGAEYAFNLNDWAARLEYQYSTPYGSRDDTGLRMDNGLLSLAAVYRFQGVAPAAVPAPEPVE  
323310327.pir AAVISASILLMSASAMQVXGKAVGTWLLDDAC..TAATANCDDDDSTAGAFVGYENMDFDLSIEGSDYDLGNMVOVQNGNGGKKAQGLQFSMKASYSFENNNDIYGRAGAMVRAETBQA.....EHSNFTGVRPLAAGIEYAFNLNDWAARLEYQYSTPYGSRDDTGLRMDNGLLSLAAVYRFQGVAPAAVPAPEPVE  
11435356.pir LITSMPLPASAASQELTFLWYGVGGVLYNNYEPSCDQTKWYCG..EDDPYVADDPVGGYLYNNYVYGLIEGSDYDLGNMVOVQNGNGGKKAQGLQFSMKASYSFENNNDIYGRAGAMVRAETBQA.....EHSNFTGVRPLAAGIEYAFNLNDWAARLEYQYSTPYGSRDDTGLRMDNGLLSLAAVYRFQGVAPAAVPAPEPVE  
44800571.pir AAIISATLLIPASSAAMQVXGKAVGTWLLDDAC..LANQTCDDDDDEVGAPGLGYQANKLWSLIEAGYDLGKLYKSGSTRNGAAfeAQLAQITLQFGFPVADNLDLYGRGGYGVTDSDQL.....DNDGGAAPVGAIGAEYAFNLNDWAARLEYQYSTPYGSRDDTGLRMDNGLLSLAAVYRFQGVAPAAVPAPEPVE  
U22K22.pir LAVITISTSLMPLPASAASQELTFLWYGVGGVLYNNYEPSCDQTKWYCG..TSSVCDDEDEVGAPGLGYQANKLWSLIEAGYDLGKLYKSGSTRNGAAfeAQLAQITLQFGFPVADNLDLYGRGGYGVTDSDQL.....DNDGGAAPVGAIGAEYAFNLNDWAARLEYQYSTPYGSRDDTGLRMDNGLLSLAAVYRFQGVAPAAVPAPEPVE  
507220598.pir IATAAMAAGATAAHAADDIYFGAGVAAHFNGLN..KIESTNVAGEEDAAAAAPFVGYNTFENPGTEFGYAGR..GNTGSRVYENQATLSGLARPLGDDPSFAEGGAYWAHTDGLG..SDTKVSPLAGGLGVYKVNDAIDLQARYRYMMDVADLHADnyKSNQSVATLEAVYHPFRtsVAPVPAPEPVE  
404632561.pir IATAAMAAGATAAHAADDIYFGAGVAAHFNGLN..NKIDGCGYAGTDEDAANAAPFVGYNTFENPGTEFGYAGR..GNTGSRVYENQATLSGLARPLGDDPSFAEGGAYWAHTDGLG..SDTKVSPLAGGLGVYKVNDAIDLQARYRYMMDVADLHADnyKSNQSVATLEAVYHPFRtsVAPVPAPEPVE  
89050991.pir IPLAFSVSNSVHASTDNFWFVAGARAGASHITMD..DAVTSVTKLEDNTFAGVAGYQNTWPFAIEGSGYTWLGEVTSKYDeSdskIEBQQAIDLVGKFIYQATDKVDLYTKVGGAGQTRAKGLP..GQTATDRDLSLIATAGLAEYHFTDNLSARAERYQYHNMEKPTGTDTKIndANYGVSLVYWGAGAPVPAVPAPEPVE





The top layer shows the consensus sequence. Residues are coloured after their physico-chemical properties. (GPX black; positive blue; negative red; CM yellow; H dark purple; NQ light purple; all others green).

[illegible]

[illegible]

020AU33.pir  
M7CYE3.pir  
V1HXEL.pir  
640533557.pir  
V21H50.pir  
514987866.pir  
585356153.pir  
640697039.pir  
640473027.pir  
498991530.pir  
668715321.pir  
668978780.pir  
639209310.pir  
635759348.pir  
635729153.pir  
639143704.pir  
J3GNI2.pir  
648211627.pir  
IQ0UM4.pir  
S3KMR0.pir  
F61L51.pir  
656056203.pir  
668995843.pir  
D4E9M0.pir  
635730670.pir  
516062260.pir  
515554885.pir  
635390596.pir  
658U02.pir  
635808248.pir  
676254741.pir  
639231046.pir  
TQ0W98.pir  
F2DCP9.pir  
J23CJ9.pir  
656483195.pir  
516228497.pir  
654439624.pir  
655681749.pir  
551320067.pir  
Q6LKZ4.pir  
V7RJ7F.pir  
654512147.pir  
659046544.pir  
573000875.pir  
640183594.pir  
G9Z416.pir  
V5F7L1.pir  
512445055.pir  
V21H50.pir  
656054969.pir  
603515169.pir  
D023T4.pir  
595581682.pir  
V5FN80.pir  
515589328.pir  
518194350.pir  
H7E932.pir  
R8ATT2.pir  
636345584.pir  
U3BW23.pir  
D1P6L2.pir  
515587028.pir  
515595246.pir  
515593644.pir  
M4U796.pir  
658927258.pir  
515595253.pir  
Q9RGQ2.pir  
U5A909.pir  
668971670.pir  
K8WC06.pir  
D5CGY2.pir



0001.pir  
162169853.pir  
515591232.pir  
A156Lr1.pir  
B8M6F3.pir  
D02BP0.pir  
62565157.pir  
G9YC49.pir  
A6CY66.pir  
S6UJ37.pir  
S7UNR7.pir  
515955248.pir  
515955251.pir  
C4SNF7.pir  
51622831.pir  
656054568.pir  
51639873.pir  
K8WNW7.pir  
658455010.pir  
B7VMH8.pir  
B5N483.pir  
G9Y8F9.pir  
A7MM58.pir  
Q6LGJ4.pir  
U3B1F8.pir  
C40763.pir  
639223498.pir  
51560344.pir  
U3CNU2.pir  
515599502.pir  
639191517.pir  
635729054.pir  
665969372.pir  
654468489.pir  
V3FCR4.pir  
V0PEX9.pir  
R9PUK1.pir  
B3GY1.pir  
L4DR10.pir  
653847214.pir  
D4B3J2.pir  
612160075.pir  
F13FD2.pir  
F9AW99.pir  
567432933.pir  
B3G3T3.pir  
C9P7F8.pir  
N0U5P6.pir  
606389932.pir  
V2X933.pir  
639210140.pir  
660552996.pir  
V2D737.pir  
674432810.pir  
A6VRQ2.pir  
T5JMD0.pir  
674212155.pir  
D4BBE1.pir  
M4JQ81.pir  
67426605.pir  
640517675.pir  
514987290.pir  
B3G651.pir  
668720668.pir  
650007777.pir  
F9T3P7.pir  
670000613.pir  
A8AGB9.pir  
654672276.pir  
585354392.pir  
635657373.pir  
603141504.pir  
655006846.pir  
K1IVK4.pir



```

677870033.pir      ATLDYRHEYAdnKDRIAIEKLPNGIGFYVDASVKsVANAIELGVSYNYKVTDNFVLQPGGFIESGPDTSIYKPYLRQYNFDSGVYMACRYRYDYARKTANYSDDEKTNRFDTYIGYVFDLKLLEYNFTWMDs.....
F6CWF0.pir        TSINMRHEIVPehSDRIEVSHRFsNGIGFGVEAKWKsGNGQOSNISYRIKLSDDLFTTPQYKWEsSGSKLSHQFNFSFGYKVSSDWSVGFHRHRYNYQAKVDDNDSHYNRWTFsAGYKGVEDWSLSSSIdfSDVNFKGEYtLNNsWKPFLEFGLKpwRPRYRLGLKYSY
551321590.pir     TSIDFRHEWKAEdaSRVKMGHNyGgNIGIEMKFRSYDalTEtELDWCYTYKYNRNWELKPGMPIAITDRKTTFKPQLRIVYRADMGLTTALRYRYEIANYADsADGDTSMETGCKINQPHRTKLTLTGadYDIGLKAGYRMG.NWOPPELWDVkrQMKLRAGVKYYF
L2W9Y8.pir        ATLDVRCCYRSGseTRLVSEGWQNGWASMEsNTWNTLNDVQVEVNYAIKLDDQWTVRPGMLTHFSSNGTRYGPYVKLSWDATKDLNFGIRYRYDWMKAYRQQDLSGDMsRDNVHRWDGyVVIYHINSDFtaTENAFVLQYHITPDITPYIEYDYLDRQGVYNGRDNLSE
655000093.pir     ASVDVRGQYrdKFESRVLLNHEWSNGIGAGfEYVVDntwKENELELYYKYKVSdtLTLLDPSLVFQDTksGDIAKIGLRANWAFAPTWRDLARVRYEHKTRDTRDLAKQWDDNDTTRSELWLKRTFNKDIInLYEHNVGAAYKLNAFKPYAEIGYlpdWRFRLGLVYSF
655481417.pir     AYLDLRHEYRdrHTRTRLILGNHFDNGYGIEMLTNVFhGISNTEITNYTYAVNKNFTLNPGLTMNPLSSNTFMFPYKLKNY.FDNGLFVHGRIYRDFSNAPMQNDfGEDETVRRNRYDWTGYNTDDYqtGREHTFKLYVKWKPDRVPLQLVDAdtEWRYIGLNLAF
NanC.pir          ATLDVRGGYRSGseTRLVSEGWQNGWASMEsNTWNTLNDVQVEVNYAIKLDDQWTVRPGMLTHFSSNGTRYGPYVKLSWDATKDLNFGIRYRYDWMKAYRQQDLSGDMsRDNVHRWDGyVVIYHINSDFtaTENAFVLQYHMTPDITPYIEYDYLDRQGVYNGRDNLSE
L0M8V3.pir        DNRLAHTTASEKNQYKIGLGHIFDNGAGVLASAMyDLgsSFQEFEGWYPLPLNDRWTLTPGGLTDDSSGTKLAPYISLDYKISKTLsFSSRYRYNMTHKDFDYNGRMDYNDShQIDLILNYQATDKLkHWEPSIVARYRMKNKWLPYAEIWLAWLdnQVRVRLGVRYF
515678629.pir     GYVDLRAEYrdQYRSRFIVGHIFDNGYGLETLTNVRhkVINTEFTHYYTYAINDNFMLNPGVVMNPGQSGNTFLMPYLKKNY.FDNGLFVHGRIYRDFSEALVNDYDNEETAkRNRYDIWTGYNTDKYmNAREHTVAKVYKWKPTVRPYAEVDAtdDWRFVRGVNFSF
Q1Z3H2.pir        TKLDVRFGNhdIKDSRVKFMHTFDSGFYfSAEAAQIhkAAaQEFEAITYKFQINDDFWfSPGLVMVTAPNWTEYRPYLKLGTVFDNGLSVTSRYRYNWSNDANGKNKLDGSGTTRGASNQFDLWLSKSfGdyWEHTVMVNYKLNETWTPYMELVSVDETYVDENgKREND
515585635.pir     TKLDVRFGNhdIKDSRVKFMHTFDTGfYfSAEAAQIhkAAaQEFEAITYKFQINDDFWfSPGLVMVTAPNWTEYRPYLKLGTVFDNGLSVTSRYRYNWSNDANGKNYLDGSGTTRGASNQFDLWVSKSfGdyWEHTVMINNYKIDDTWTPYMELVSVDETYVDSNGNREND
A6AML5.pir        TKLDVRFGNhdIRDSRVKFMHTFDTGfYfSAEAAQIhkAAaQEFEAITYKFDLGEDWYAPGLVMVTAPNWTEYRPYLKLGTVFDNGVSLTCRYRYNWSNDANGKNYLDGSGTTRGASNQFDLWISKNfGdyWEHTIMVNYKLNETWTPYMELVSVDETYVDEQGNREND
603142470.pir     RYIRELKAYPYGCGLEQTSGLFPALYTNAAQLQSLGITGDSDEKRRAAVDIgsRILQMQRDNGGXXGFDTSIYKPYLRQYNFDSGVYMACRYRYDYARKTANYSDDEKTNRFDTYIGYVFDLKLLEYntNYEHNVALAWLKNKsFTPYVEGVNVarQRYRYRVLQYHF
655487076.pir     AQIDFRHEWRShdaSRVKLGtGfNaNIGIEMKFASfdeLTETELEDLGLTYKMG.KWQIKPGMPIALTDRKTTFKPQIRVVYKSDfGLTTALRYRHEfANYSdPTDGDNTVETGLKVNDPTRSKVTLTGfSyeYDAGIVVGYQfG.NWRPPFAELWTIdrQAKYRAGIKYKF
571190120.pir     .....MRVGYNsDMGAGIMLTNTYtKhGYNEIEGWYPLFktDKLTIQPGGLINDKsIGSGGAVYLDVNYKfTPWFNLTVRNRYNHNHYSSTDLNGDLNDNDTYEIGNYWNfAITDKFshWEITNTfKYRINEHWLPYELRWLDrgNQIRVGAkYFF
R9NJI7.pir        VSMdYRHEYRtthYDKLTLSQLPANyFFAAETKFKtVLNAVEMTLGKKIIG.NMTVSPHIIQPEFNsRTEWKFgVSPWYKINNRWSVGLLYRLELTDYAHDDLsgCANCSTNKHRTVNRVDGYLRFfRvnyYEQELQFNyALgkEWSPYISfGDInrQLRLRAGLAYTF
G5P738.pir        ATLDYRHEYAdnKDRIAIEKLPNGIGFYVDASVKsVANAIELGVSYNYKVTDFHVLQPGGFIESGPDTSIYKPYLRQYNFDSGIYMACRYRYDYARKTANYSDDEKTNRF.....DTYIGYVFDLKLLEYNFTWMDSDQIKFTTGWIAIK
H9YCG4.pir        .....MLRVGYNfDMGAGIMLTNTYtfKhGYNEIEGWYPLFktDKLTIQPGGLINDKsIGSGGAVYLDVNYKfVPWFNLTVRNRYNHNHYSSTDLsgELDNNDTYEIGTYWNfKITDKFshWEITNTfRYRINEHWLPYELRWLDrgNQIRIGTKY..
578244172.pir     TSVDLRFgHndVNSDRIVKMHQADNGFYfSVfEAQNhtEAAQIEIETRWRFDLGNGfAIApGMVTVFTASNTHYRPFIQGWKTFDNGLNLSARRYRYNTVNDASHDKRLDGSgyTRRESHQFDLWFAYNIgtYWEHTVAFNYKLDGgWTPPYVELVSLDKTYLTQDGNHEND
673534431.pir     TSVDLRFgHneANDSRIVKMHQADNGFYfSVfEAQNhtEAAQIEIETRWRFDLGdGYSVAPGMVTVFTSSNTHYRPFIQGWKsFDNGLNLSARRYRYNTVNDASHDRELdGSgyTRRESHQFDIWFAYNIgtYWEHTLAFNYKLDGgWTPPYVELVSLDKTYINDDGHEND
498113550.pir     LELNYEHKYedeHTDEIEISHDFESGIGIGSKLKSHPVlseKEFKINYNKDITDRFSIEPGMSFTIKDDEEKYKPSIKFKYRLfDKTKLSLRYRKEISDRDEKPTKRVDIEGKISQKIGKFDLGYLTyNTEHEVEVGYQTKHFSPYIGVKNEarQTEYIVGMNYKF
515599487.pir     .....FYfSGELKfKGADGDFMKDLKNNGWELDLGYRYKfDgnWTIQPGMPIESRESGMYTKPQLRATYALEsgLSLSARRYDYIKTYNSNGDSTENRHRITGNVNYSVADWKfGEayNIYDNKEENYELngDWYPYVEfGDVsrELRSRVGLTYSF
671631157.pir     ATVDYRHEYRltthYDKLGLSTTLPDNMFLGVETKFKtVLNVVEVTLFksYYWG.NWTLSPFIQPEFNsRTEWKFgVAPWYKfIDRWSLGGLYRLELTDYAHDDQCRtGGIDYCDTDRHRTANRFDLYlddYEQELQFDYALdRVVVPYVTFGDIGrQLRLRtGILYIY
654547603.pir     TSVDLRFgHndVNSDRIVKMHQADNGFYfSVfEAQNhtEAAQIEIETRWRFNLGNGfAVAPGMVTVFTPSNTHYRPFIQGWKAfDNGLNLSARRYRYNTINDASHDKELDGSgyTRRQSHQFDIWFAYNIgtYWEHTVAFNYQLDDGgWTPPYVELVSLDKTYINNDGNHEND
668994791.pir     LSLDYRHEYRvtthYDKLNMSAALPDNYNfSIEtKYKtVLNAVELTlKSfTFG.NFKIAPLIQPEFNsRTEWKFgVWPWYtINENWAIgGMRYRfELTDYANDPDcGYNGDKSCSTNKHRTVNRGDLylyDYEQEWQFDYSLgkEWKPYVTFGDIGrQfRLRMGVVYTF
594396893.pir     VTYDYRHGYRltthYDKLALGASLPDNWAFNVETKFKtVLNVVEMTLLKTYNWG.NWSWSPFIIQPEfSSRTEWKFgVAPWYKfINDSWSIGGLYRLELSDYAHDSQCCDAGHDfCSLDKHRTVNRfDAYEdNYEQELQFNyAMGaewGPyITfADIGrQLRLRLGVTYTF
515594352.pir     .....SIGNFYfSGELKfKfKADGDFMKDLQNNGWELDLGYRYKIDgnWTIQPGMPIEGRSSGMYTKPQLRATYALBsgLSLSARRYRYDIRTHSNGDSTQfRHRITGNVNYSVADWKfGfEAnnYELNLTAGRKfG.DWYPYVEfGDVnELRSRVGLTYSF
A6CXPl.pir        NYVDVRGAYkttyETRVrAGfDfQaAQGDKLFsNSGKSVAAFETELNYNWAINDNFTLTPGfVYWNsgDHMEYRPYLKATYAEgn.FYTAARYRYQAASSSTTPGVKtNDNTQYDLWVGYNLNDfALEYtKWHEHTfQVKYtGFESWAPYVDYQILdtENIRAGVTFNF

```

The top layer shows the consensus sequence. Residues are coloured after their physico-chemical properties. (GPX black; positive blue; negative red; CM yellow; H dark purple; NQ light purple; all others green).

[illegible]

The top layer shows the consensus sequence. Residues are coloured after their physico-chemical properties. (GPX black; positive blue; negative red; CM yellow; H dark purple; NQ light purple; all others green).



[illegible]







[illegible]









[illegible]

The top layer shows the consensus sequence. Residues are coloured after their physico-chemical properties. (GPX black; positive blue; negative red; CM yellow; H dark purple; NQ light purple; all others green)



[illegible]



[illegible]



B12B15.pir  
F38780.pir

ESSEI EALGFYGGPGLKALAAAGITTVLYIGEGFASTGGELRRQTT..PQGRLEDAALDIDRLKLAGMGCAFPHTVFDINHGGLSSFPVH.....HLTVVSGIeGDTLDFELMIDGSPYDQSPFVKIGVQADTFaGSAVVFVAGFQNGHIGAVVpSGDPTVPLATTALCKEYSPTELSFGQGLFNGDPAQ:SRHRTYDHFVVDKALLIGEVAYAVH1:LPGTATLQGHMFQFESSELDVAGSELLADGEASGVaKQTVLIVAMIDQTVVREGRDEAGSAFLISAVPGRHLIDVYDAGIAYGLKGRPQDTAGLGHRRISDAARAFMDA.....LLPOTGPAPLRSEKTVFEATYGAVVKGLTVKGLQVQVMSGGSLADGAVVGLSAVTVY  
VASSEIAGGHLpGIALKESLpRGVTFAPTYGKAMADVGGI..SRGHVYVRELTLQTFRLGRFGPTQNTVHTLLAKVGRVGEISDRVGD...YHIELKRVyLlSgVAILTSMVAKESFHITVGLAFGKALTVFATSpEFPST..CSAPVAILDLGDFVTFATWQKRVSLRTPDTLVQIGAYGVRLN.RDISHHAWAGEKSTGLAHIPRFAMRFFpGLPGLVYLGFAIDTTRYAHN...LGEVYAGSAIRPGGGRAROTTYLEADQGLVREKZASpAGTVLAGYIHDTTVVSVISSEFYVGSLLGIIPKRFDRPQVNGSYVRGSPRELGQLRKGAGNALOVHVG...PQTGAAVLEAYGVVVFPGILVLPKFPQVMSPGGTARIDPAAVVELKVTITL

The top layer shows the consensus sequence. Residues are coloured after their physico-chemical properties. (GPX black; positive blue; negative red; CM yellow; H dark purple; NQ light purple; all others green).





K7270, p1: KDSFGDSFVSIKKGALIKESG,KNVFKGVLYDFALSSVp41GKGFSSKAKLAFI1GNGGSPYELIAYL.....DQVLTIAQVYDG,PLKTIIGQVTPGLKELSSBNTSVVERKAPTDAF...GFERRVGLSATVHLGDFMLRGGIFSDHIDGLDQDGSFVGGVYVATIV,DOALHLSGVHIDGLDEIDSTVR,KPLVNSVGTPIHTDILGAEDEL.....VGLDAVIAIGFPHAAETNAKIHVE,LAQVTFPGSTEAQVFIQDAEYK...GGVFGDAQDGGTGMUTHLRFHLDVAGIV.....GGKDAVMAELIWTQVNVVELDYGHLAYGVKADRFVGVVGLAKTULGF  
N48236, p1: PFPAAAEETIISWGPFTTHDQ...AFKVGKGLDAGVYSHPGSDdSPGTSKAKLKLGGKGLSGSPKYLELEQNE....VELVDTFTST,KMLVAIGKQVPLSLRGTDTTGVMEKAVTD,APGFERHLGISAGYHGCWIDIGALSBDGSGSDNSISFVGGVYVATIV,DTVLHFGASDHHTLRLAKPTVR,KPLRSTSTVLTLYGLAV.....DQVYVGLAAALIGFPHAAETNAKIHVE,LAQVTFPGSTEAQVFIQDAEYK...GGVFGDAQDGGTGMUTHLRFHLDVAGIV.....VGLDAVMAELIWTQVNVVELDYGHLAYGVKADRFVGVVGLAKTULGF  
Q21934, p1: DQSEVYACALSHHMDVAFADAGKRWYGMHLDTALSTTDLAHdPQFIRKMLATVSGSLPQFQKAEVTA....MEVTPDVYLSHPLKATLHAGLTCGHEJTBGHWSTFBAVFD,APQSTRLGATVYKELPFDGLPQVAGISGLDPLVHGLAAATTPVQ,SGVHGLA-KVHPLAJHHHATLCTGDSAGLIRYAPVLTTSAPFTDQALSDQVLEKAVVGFQAFQKAAVAREHTAGHDSFHSFELDTFETGHWKHLKPLKATVLEHPLKAGAPLILKDTLHSHHLLKATPFGKGGVDTLLGVWFWKVFPLKHTVETGTFAPLSTYDALAAQVDF  
Q214V5, p1: KHALMGQVGFQGGVTTISSDHYAKISGLAFHSDIGPMHSPRRGEGJTESKAKLAPISSEFY,KWIAITVDFGSDGDTSTSLYKALVYAGPHTVITAGVFPVHVKRDESRHFRIMKQATVDEVHIAAGDANSLGALVAREKTIAGVTD,TTQELVDS,SGATVWAGRPVNSKDIVHGLAATPFEVAKASDGRVWF.....SEAPVQVLTLLSATVSGVSHSAGIKGPHHRLTLKRYTHLOVTRSDQATVWTFDTYGAATVTFGGRKYTLKSGATAAGSPSTYHGLAETARYDVADLHILGASTALR...GGQVTHAGLAWYVHHRFPLGLFPHIVKSTAAAGRRGVSAGLQAV

The top layer shows the consensus sequence. Residues are coloured after their physico-chemical properties. (GPX black; positive blue; negative red; CM yellow; H dark purple; NQ light purple; all others green).

[illegible]











[illegible]





[illegible]







65521693.pir  
65521694.pir  
65521695.pir  
65521696.pir  
65521697.pir  
65521698.pir  
65521699.pir  
65521700.pir  
65521701.pir  
65521702.pir  
65521703.pir  
65521704.pir  
65521705.pir  
65521706.pir  
65521707.pir  
65521708.pir  
65521709.pir  
65521710.pir  
65521711.pir  
65521712.pir  
65521713.pir  
65521714.pir  
65521715.pir  
65521716.pir  
65521717.pir  
65521718.pir  
65521719.pir  
65521720.pir  
65521721.pir  
65521722.pir  
65521723.pir  
65521724.pir  
65521725.pir  
65521726.pir  
65521727.pir  
65521728.pir  
65521729.pir  
65521730.pir  
65521731.pir  
65521732.pir  
65521733.pir  
65521734.pir  
65521735.pir  
65521736.pir  
65521737.pir  
65521738.pir  
65521739.pir  
65521740.pir  
65521741.pir  
65521742.pir  
65521743.pir  
65521744.pir  
65521745.pir  
65521746.pir  
65521747.pir  
65521748.pir  
65521749.pir  
65521750.pir  
65521751.pir  
65521752.pir  
65521753.pir  
65521754.pir  
65521755.pir  
65521756.pir  
65521757.pir  
65521758.pir  
65521759.pir  
65521760.pir  
65521761.pir  
65521762.pir  
65521763.pir  
65521764.pir  
65521765.pir  
65521766.pir  
65521767.pir  
65521768.pir  
65521769.pir  
65521770.pir  
65521771.pir  
65521772.pir  
65521773.pir  
65521774.pir  
65521775.pir  
65521776.pir  
65521777.pir  
65521778.pir  
65521779.pir  
65521780.pir  
65521781.pir  
65521782.pir  
65521783.pir  
65521784.pir  
65521785.pir  
65521786.pir  
65521787.pir  
65521788.pir  
65521789.pir  
65521790.pir  
65521791.pir  
65521792.pir  
65521793.pir  
65521794.pir  
65521795.pir  
65521796.pir  
65521797.pir  
65521798.pir  
65521799.pir  
65521800.pir  
65521801.pir  
65521802.pir  
65521803.pir  
65521804.pir  
65521805.pir  
65521806.pir  
65521807.pir  
65521808.pir  
65521809.pir  
65521810.pir  
65521811.pir  
65521812.pir  
65521813.pir  
65521814.pir  
65521815.pir  
65521816.pir  
65521817.pir  
65521818.pir  
65521819.pir  
65521820.pir  
65521821.pir  
65521822.pir  
65521823.pir  
65521824.pir  
65521825.pir  
65521826.pir  
65521827.pir  
65521828.pir  
65521829.pir  
65521830.pir  
65521831.pir  
65521832.pir  
65521833.pir  
65521834.pir  
65521835.pir  
65521836.pir  
65521837.pir  
65521838.pir  
65521839.pir  
65521840.pir  
65521841.pir  
65521842.pir  
65521843.pir  
65521844.pir  
65521845.pir  
65521846.pir  
65521847.pir  
65521848.pir  
65521849.pir  
65521850.pir  
65521851.pir  
65521852.pir  
65521853.pir  
65521854.pir  
65521855.pir  
65521856.pir  
65521857.pir  
65521858.pir  
65521859.pir  
65521860.pir  
65521861.pir  
65521862.pir  
65521863.pir  
65521864.pir  
65521865.pir  
65521866.pir  
65521867.pir  
65521868.pir  
65521869.pir  
65521870.pir  
65521871.pir  
65521872.pir  
65521873.pir  
65521874.pir  
65521875.pir  
65521876.pir  
65521877.pir  
65521878.pir  
65521879.pir  
65521880.pir  
65521881.pir  
65521882.pir  
65521883.pir  
65521884.pir  
65521885.pir  
65521886.pir  
65521887.pir  
65521888.pir  
65521889.pir  
65521890.pir  
65521891.pir  
65521892.pir  
65521893.pir  
65521894.pir  
65521895.pir  
65521896.pir  
65521897.pir  
65521898.pir  
65521899.pir  
65521900.pir  
65521901.pir  
65521902.pir  
65521903.pir  
65521904.pir  
65521905.pir  
65521906.pir  
65521907.pir  
65521908.pir  
65521909.pir  
65521910.pir  
65521911.pir  
65521912.pir  
65521913.pir  
65521914.pir  
65521915.pir  
65521916.pir  
65521917.pir  
65521918.pir  
65521919.pir  
65521920.pir  
65521921.pir  
65521922.pir  
65521923.pir  
65521924.pir  
65521925.pir  
65521926.pir  
65521927.pir  
65521928.pir  
65521929.pir  
65521930.pir  
65521931.pir  
65521932.pir  
65521933.pir  
65521934.pir  
65521935.pir  
65521936.pir  
65521937.pir  
65521938.pir  
65521939.pir  
65521940.pir  
65521941.pir  
65521942.pir  
65521943.pir  
65521944.pir  
65521945.pir  
65521946.pir  
65521947.pir  
65521948.pir  
65521949.pir  
65521950.pir  
65521951.pir  
65521952.pir  
65521953.pir  
65521954.pir  
65521955.pir  
65521956.pir  
65521957.pir  
65521958.pir  
65521959.pir  
65521960.pir  
65521961.pir  
65521962.pir  
65521963.pir  
65521964.pir  
65521965.pir  
65521966.pir  
65521967.pir  
65521968.pir  
65521969.pir  
65521970.pir  
65521971.pir  
65521972.pir  
65521973.pir  
65521974.pir  
65521975.pir  
65521976.pir  
65521977.pir  
65521978.pir  
65521979.pir  
65521980.pir  
65521981.pir  
65521982.pir  
65521983.pir  
65521984.pir  
65521985.pir  
65521986.pir  
65521987.pir  
65521988.pir  
65521989.pir  
65521990.pir  
65521991.pir  
65521992.pir  
65521993.pir  
65521994.pir  
65521995.pir  
65521996.pir  
65521997.pir  
65521998.pir  
65521999.pir  
65522000.pir















33











The top layer shows the consensus sequence. Residues are coloured after their physico-chemical properties (GPY black; positive blue; negative red; CM yellow; H dark purple; NQ light purple; all others green).
